# Supplementary material for: Diastereoselective synthesis of spiro[benzo[d]pyrrolo[2,1-b]thiazole-3,3′-indolines] via cycloaddition reaction of N-phenacylbenzothiazolium bromides and 3-methyleneoxindoles
Source: Royal Society of Chemistry journal article supplement (doi:10.1039/c5ob01374g), 2015-01-01

**Diastereoselective synthesis of spiro[benzo[d]pyrrolo[2,1-b]thiazole-3,3'-  
indolines] via cycloaddition reaction of *N*-phenacylbenzothiazolium bromides  
and 3-methyleneoxindoles**

Guo-Liang Shen, Jing Sun, Chao-Guo Yan\*

**Supporting Information**

**<sup>1</sup>H and <sup>13</sup>C NMR spectra of all new compounds**

**2-28**

Crystallographic data **3e** (CCDC 1410551), **3l** (CCDC 1410552), **3n** (CCDC 1410553), **3q** (CCDC 1410554), **4d** (CCDC 1410555), **4e** (CCDC 1410556), and **5b** (CCDC 1410557) have been deposited at the Cambridge Crystallographic Database Centre.



**1-benzoyl-5'-fluoro-2-(4-methylbenzoyl)-2,3a-dihydro-1H-spiro[benzo[d]pyrrolo[2,1-b]thiazole-3,3'-indolin]-2'-one (3b):**

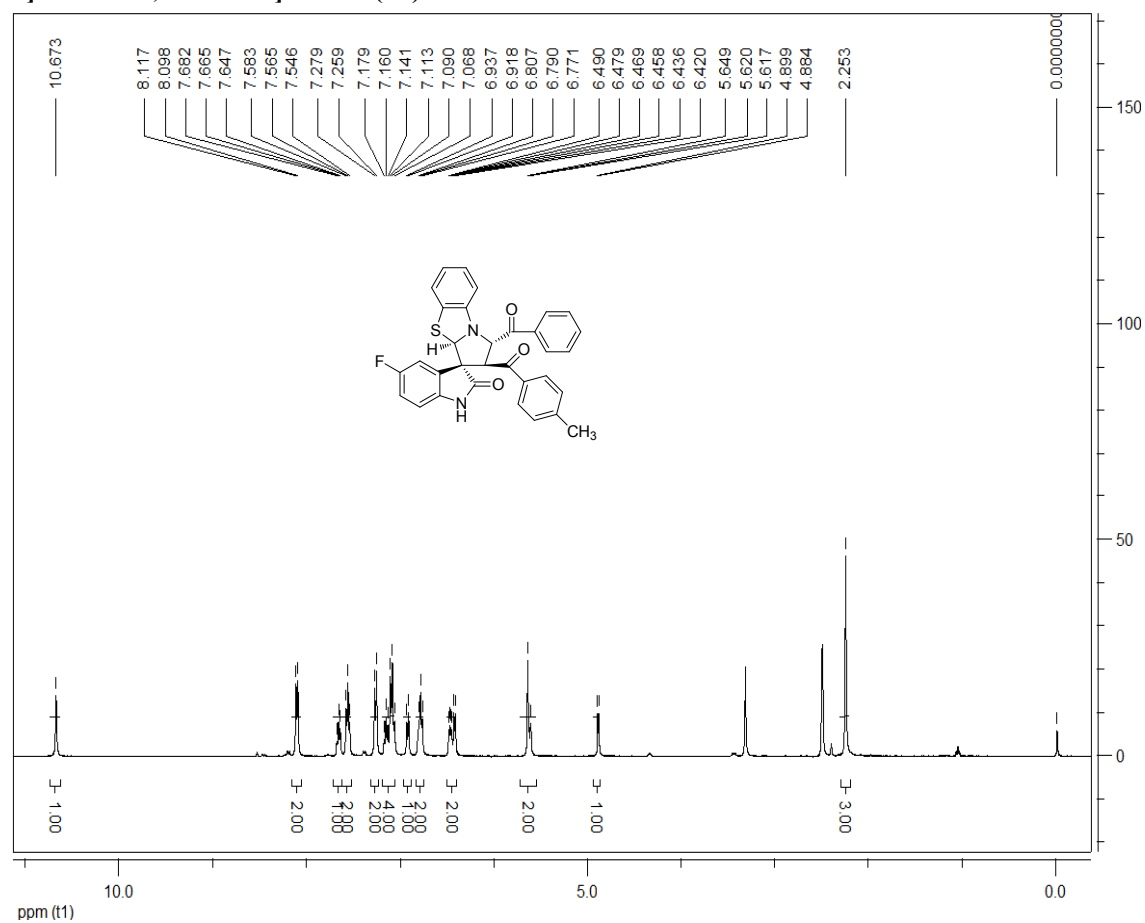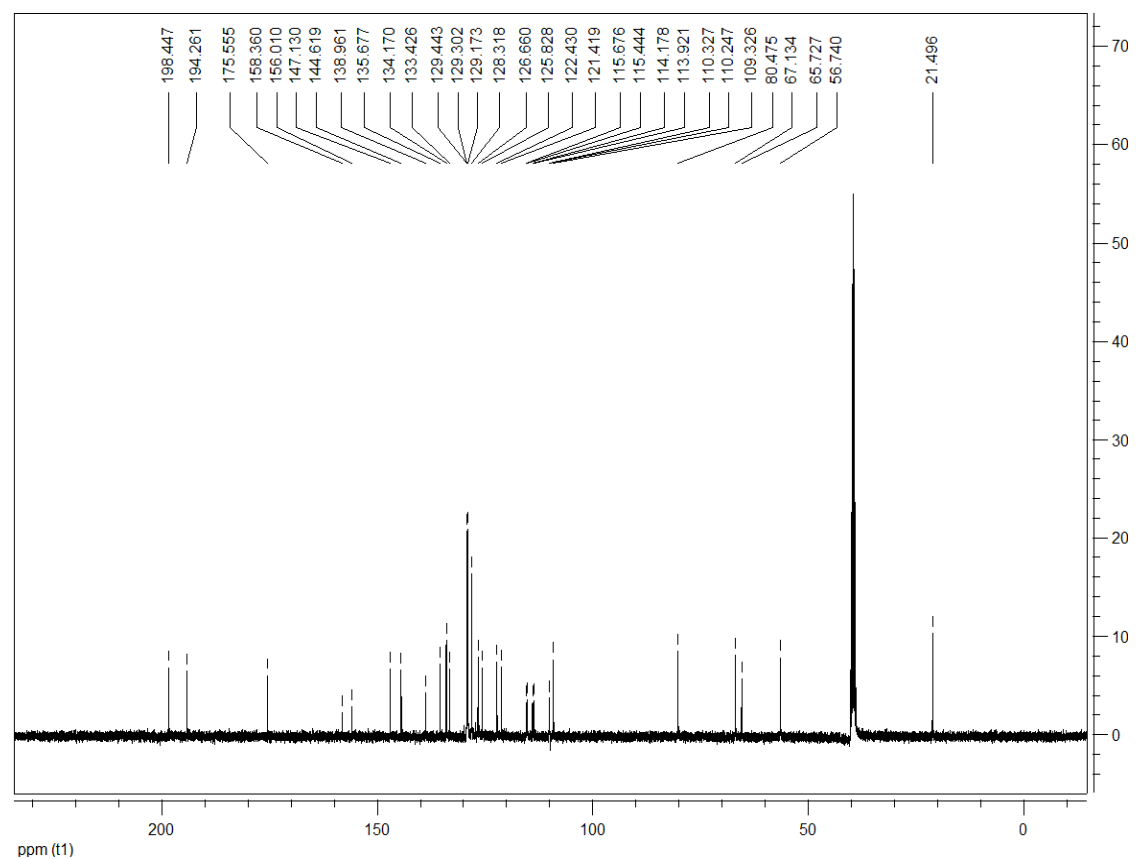

**1-benzoyl-1'-benzyl-5'-chloro-2-(4-methylbenzoyl)-2,3a-dihydro-1H-spiro[benzo[d]pyrrolo[2,1-b]thiazole-3,3'-indolin]-2'-one (3c):**

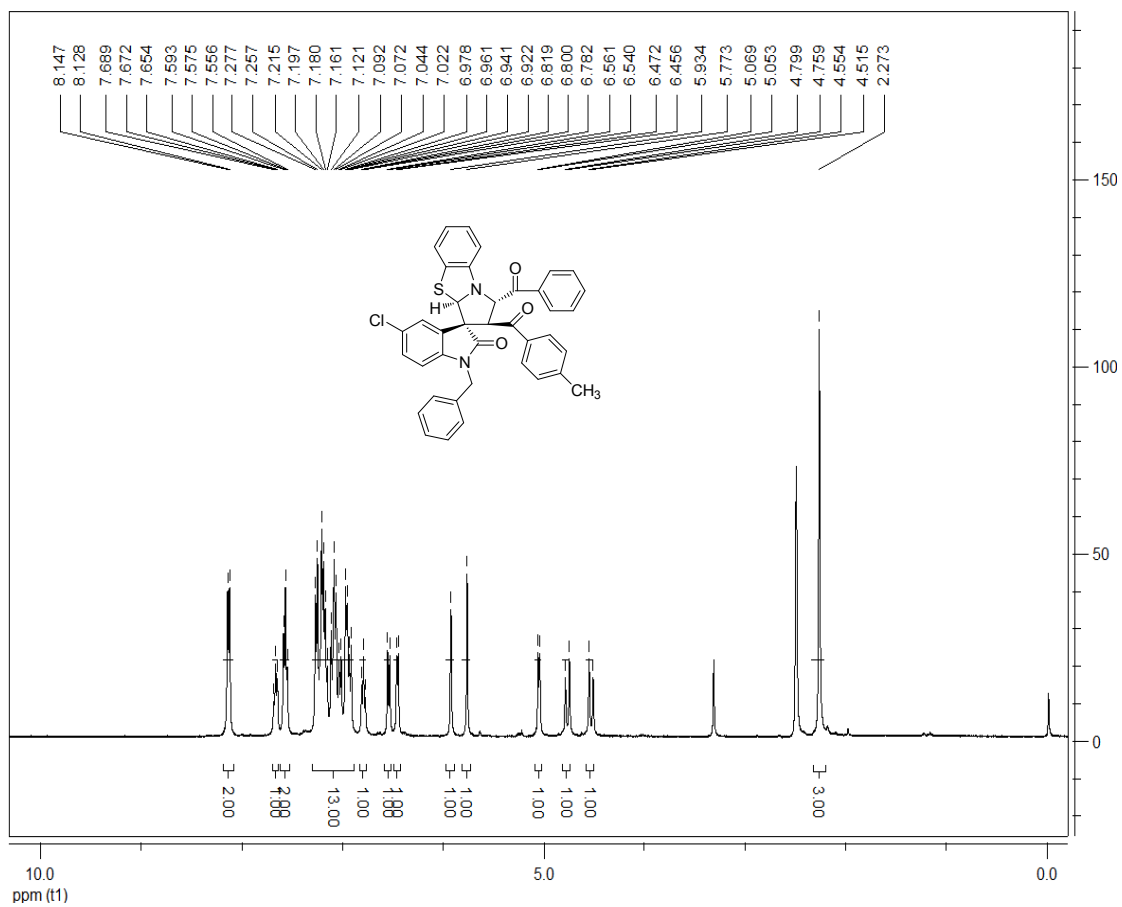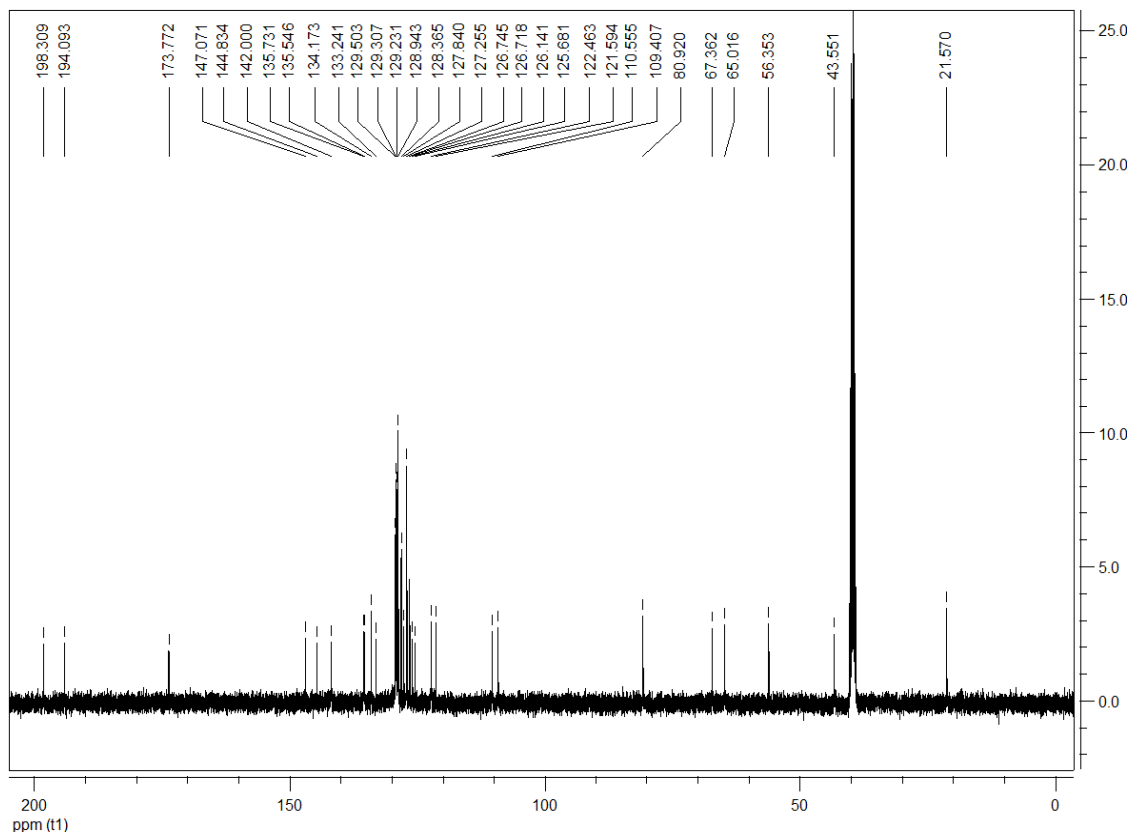



**1-(4-chlorobenzoyl)-5'-methyl-2-(4-methylbenzoyl)-2,3a-dihydro-1H-spiro[benzo[d]pyrrolo[2,1-b]thiazole-3,3'-indolin]-2'-one (3e):**

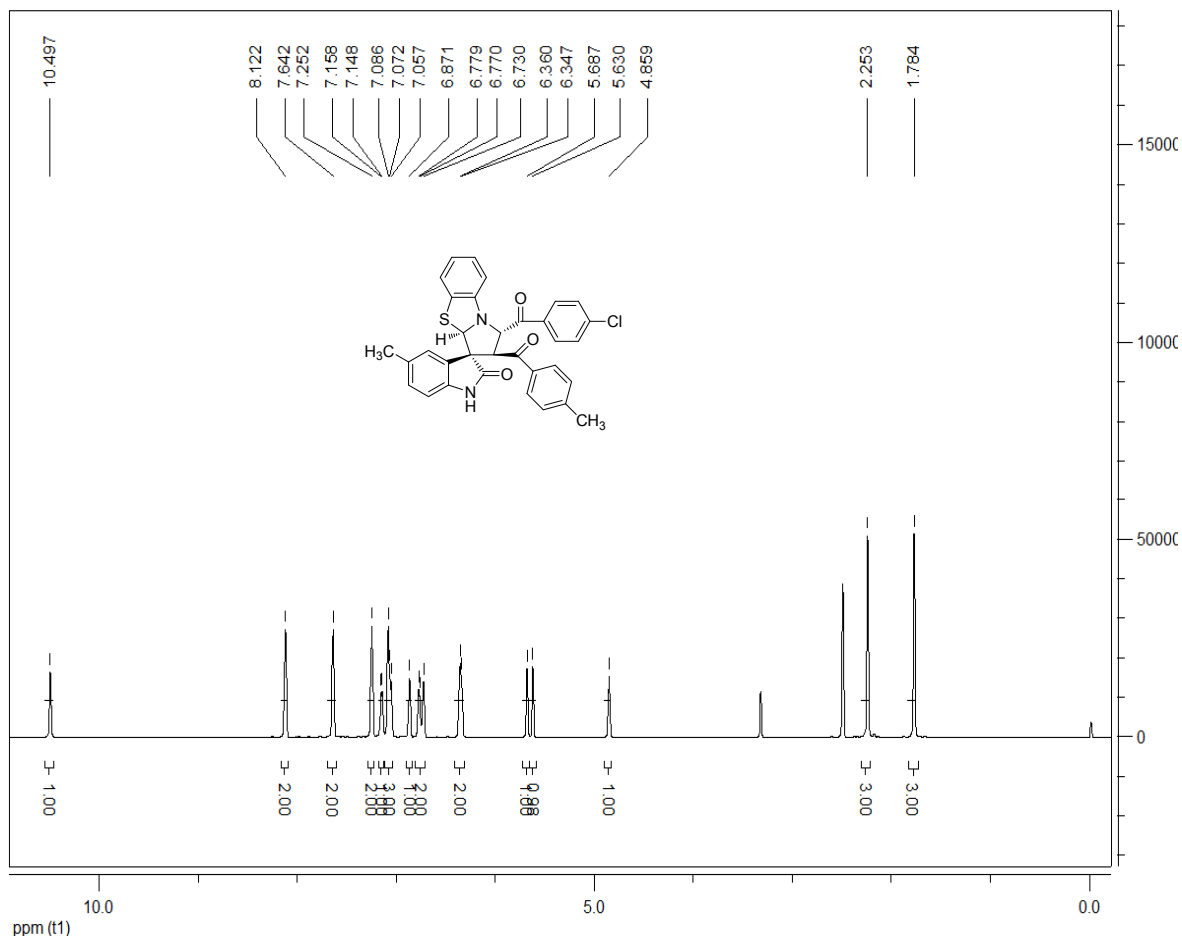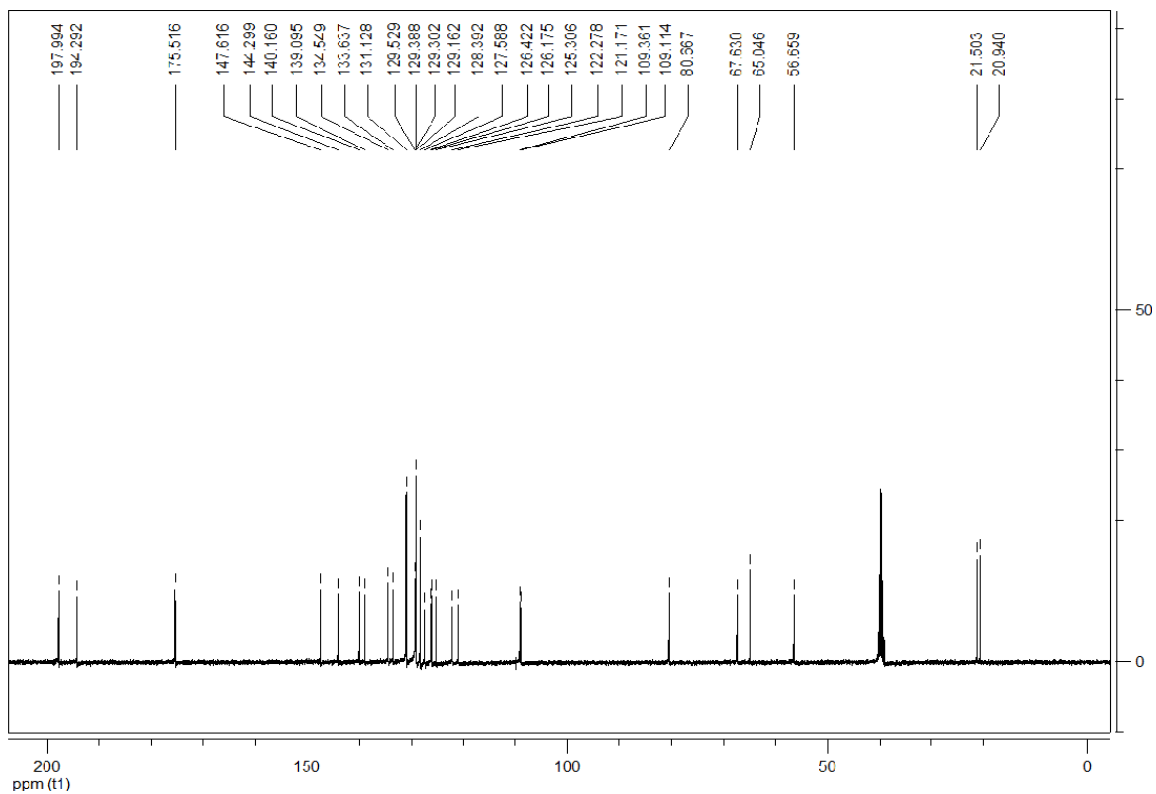

**1-(4-chlorobenzoyl)-2-(4-methylbenzoyl)-2,3a-dihydro-1H-spiro[benzo[d]pyrrolo[2,1-b]thiazole-3,3'-indolin]-2'-one (3f):**

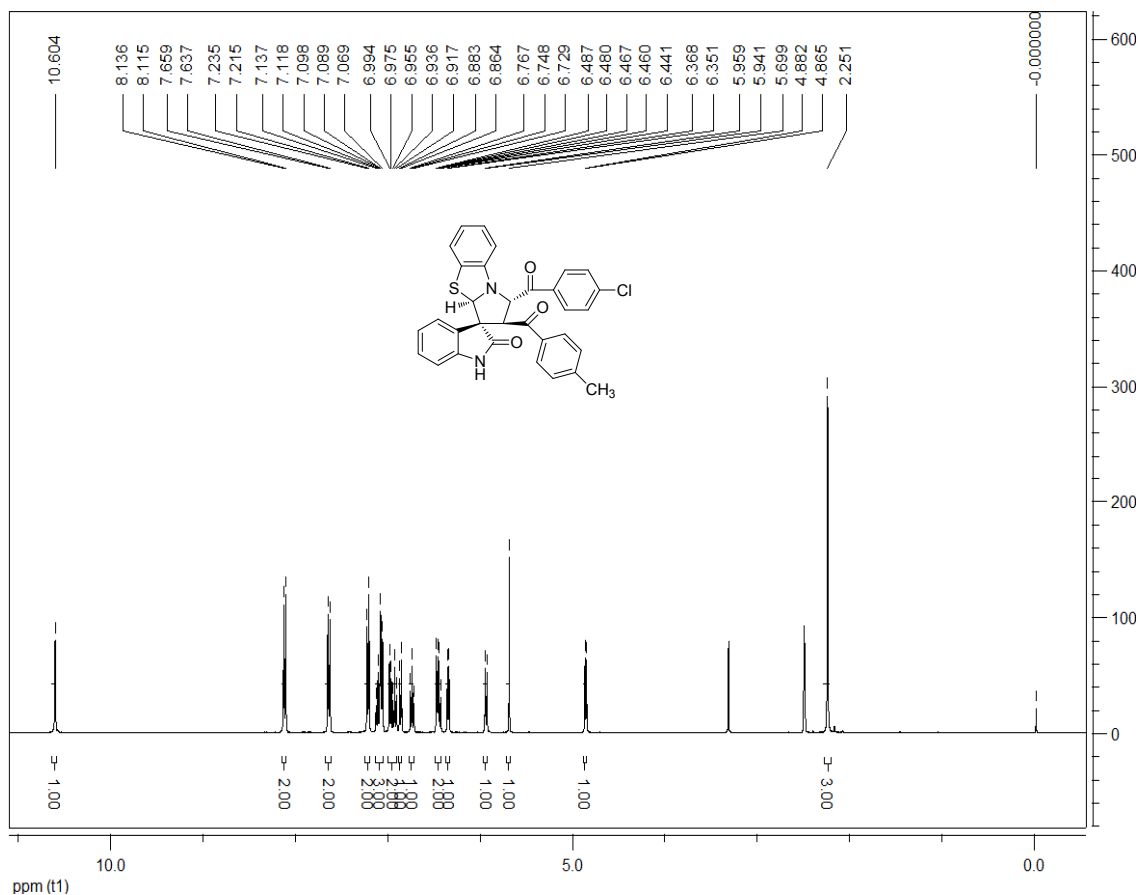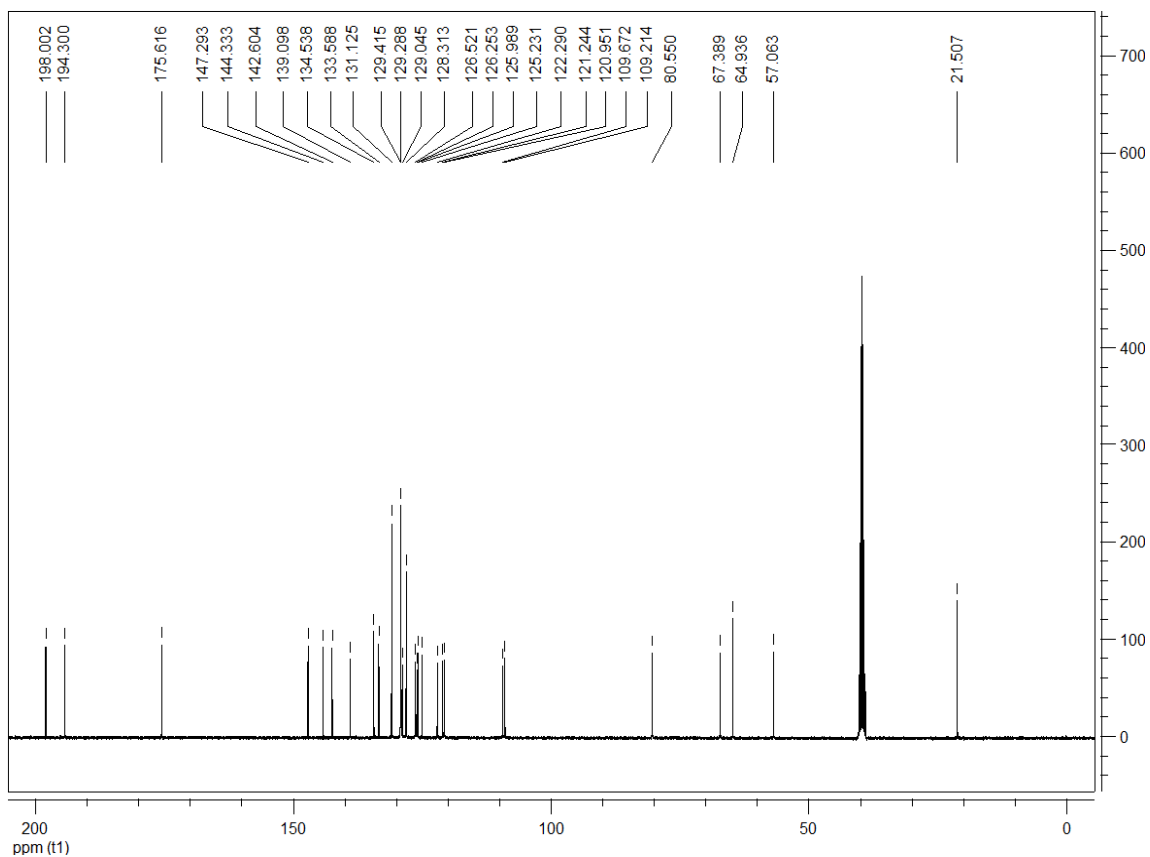





**1'-benzyl-1-(4-chlorobenzoyl)-2-(4-methylbenzoyl)-2,3a-dihydro-1H-spiro[benzo[d]pyrrolo[2,1-b]thiazole-3,3'-indolin]-2'-one (3h):**

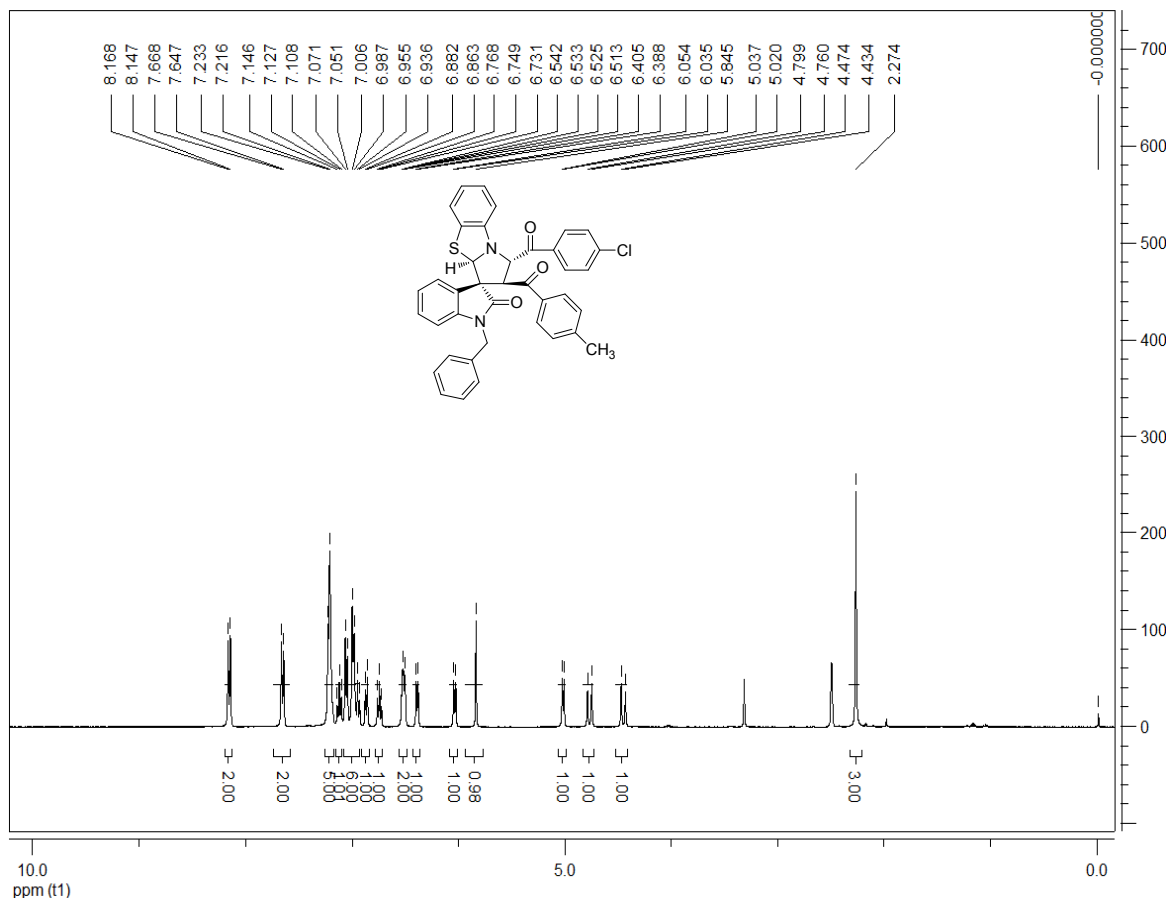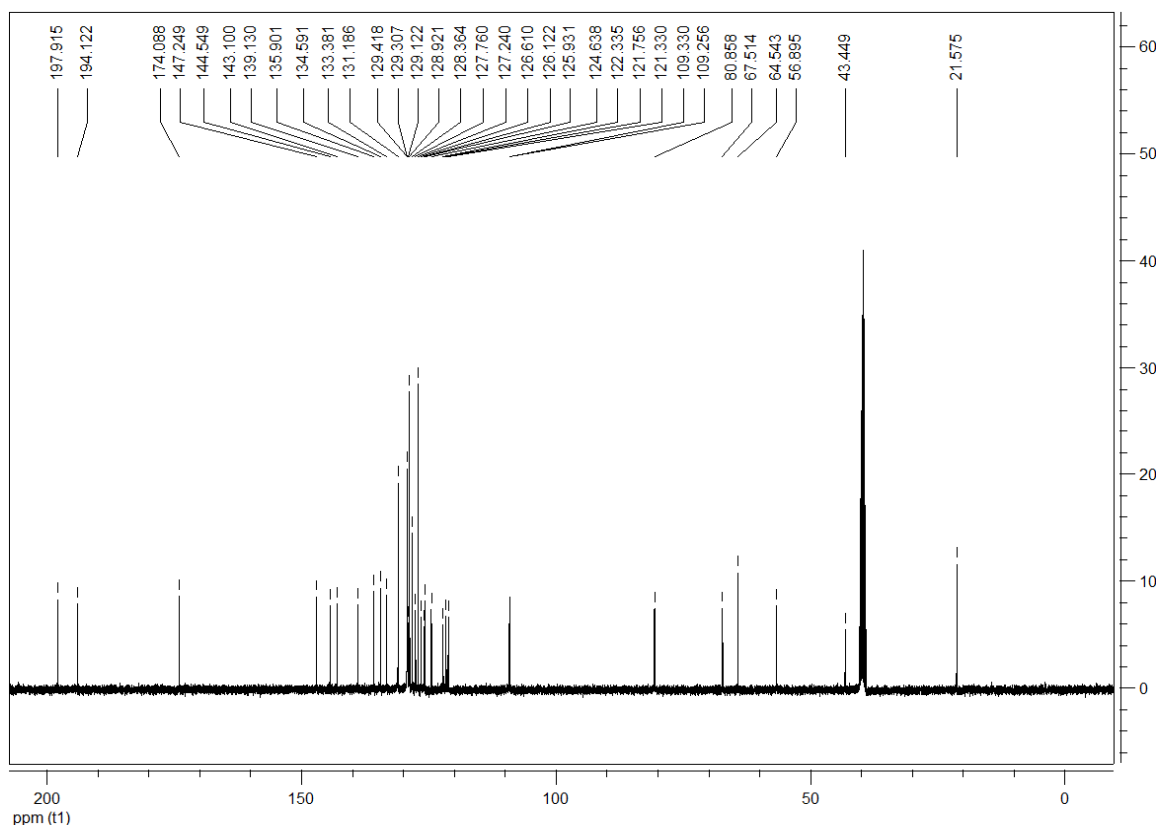

**1'-benzyl-1-(4-chlorobenzoyl)-5'-methyl-2-(4-methylbenzoyl)-2,3a-dihydro-1H-spiro[benzo[d]pyrrolo[2,1-b]thiazole-3,3'-indolin]-2'-one (3i):**

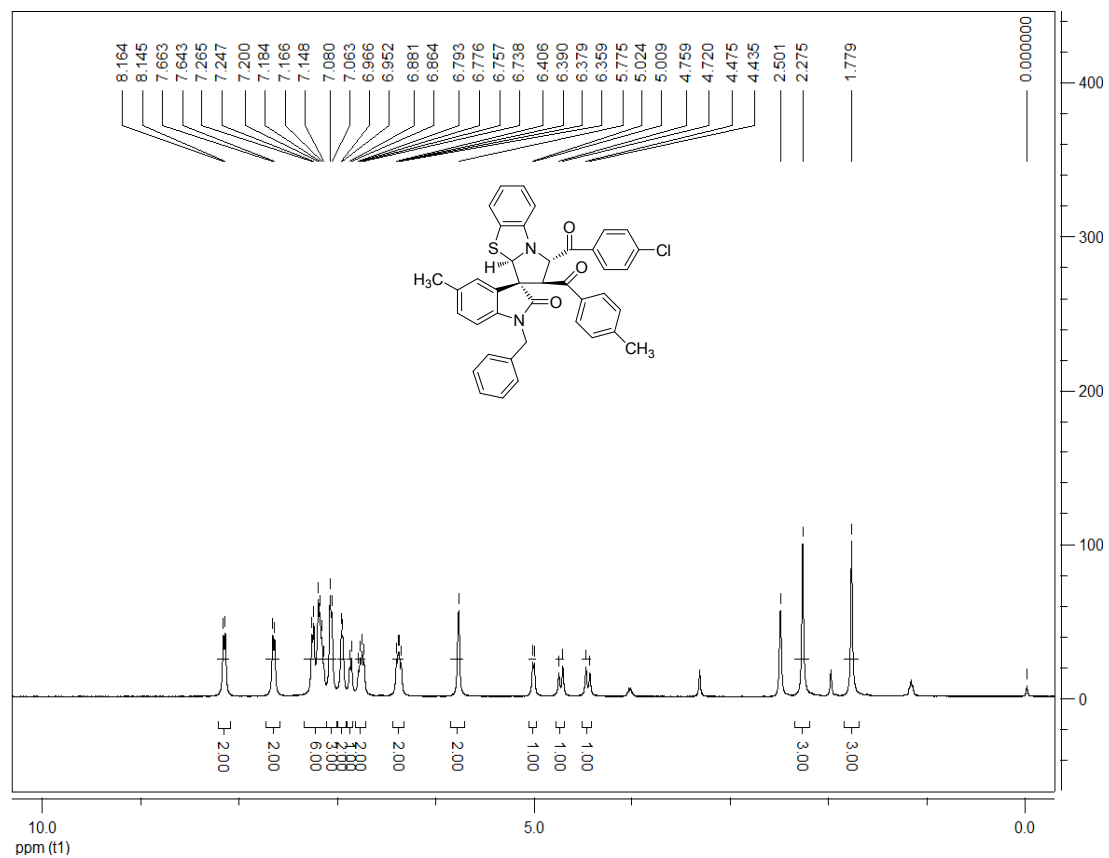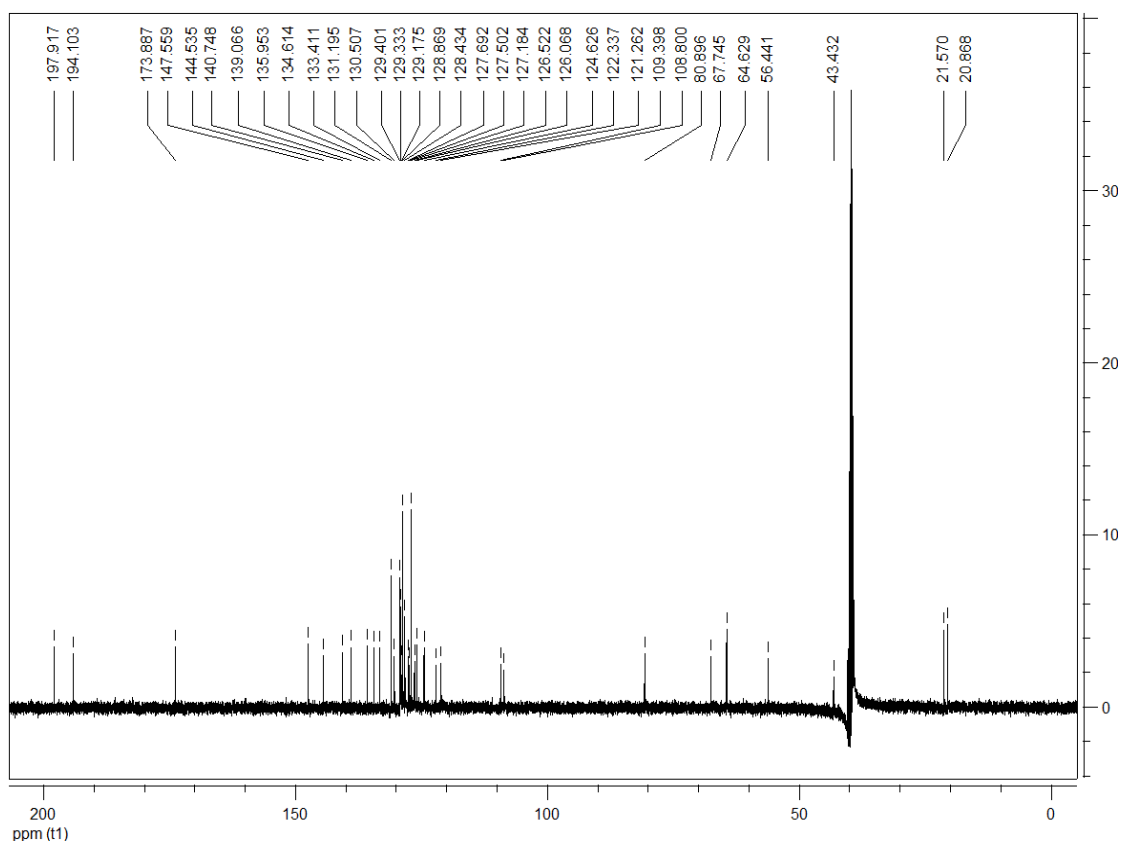

**1'-benzyl-5'-methyl-2'-oxo-2,3a-dihydro-1H-spiro[benzo[d]pyrrolo[2,1-b]thiazole-3,3'-indoline]-1,2-diyl)bis((4-chlorophenyl)methanone) (3j):**

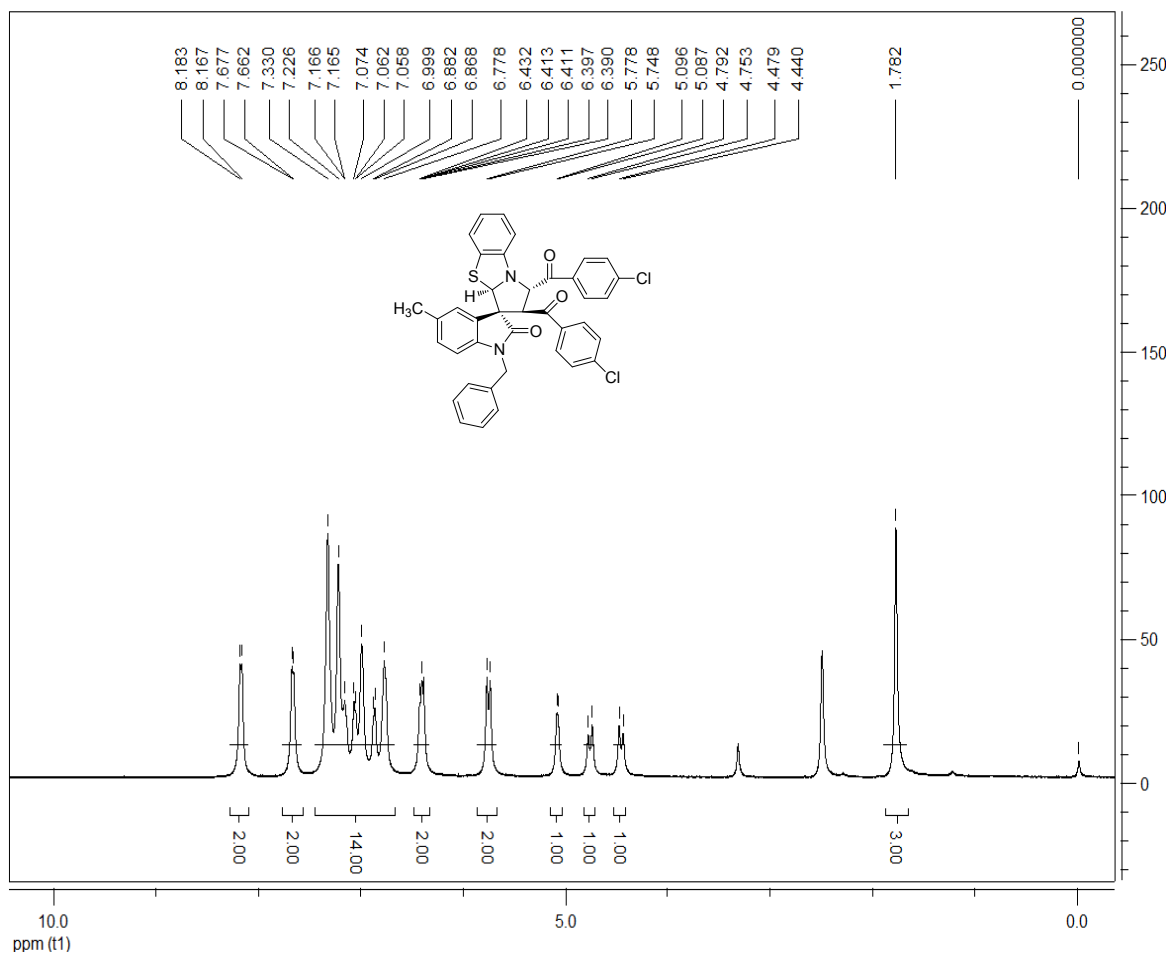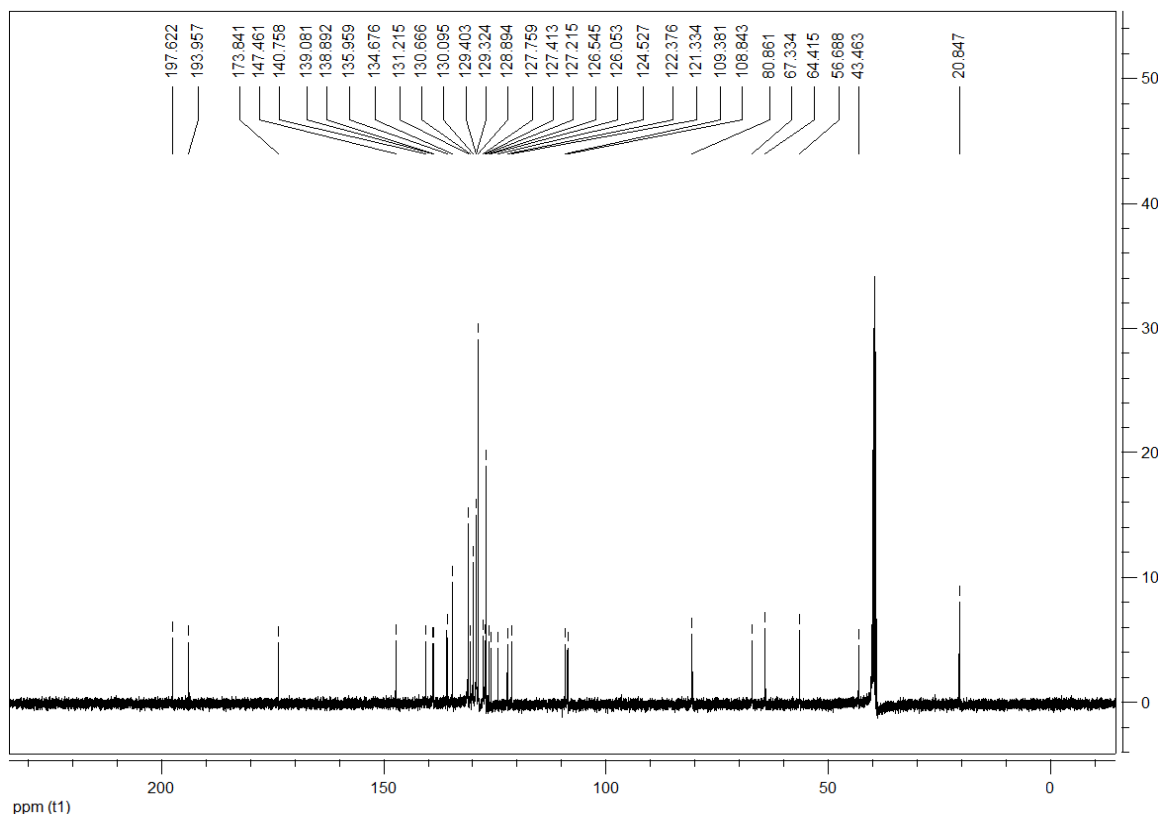

**1'-benzyl-1-(4-chlorobenzoyl)-5'-fluoro-2-(4-methylbenzoyl)-2,3a-dihydro-1H-spiro[benzo[d]pyrrolo[2,1-b]thiazole-3,3'-indolin]-2'-one (3k):**

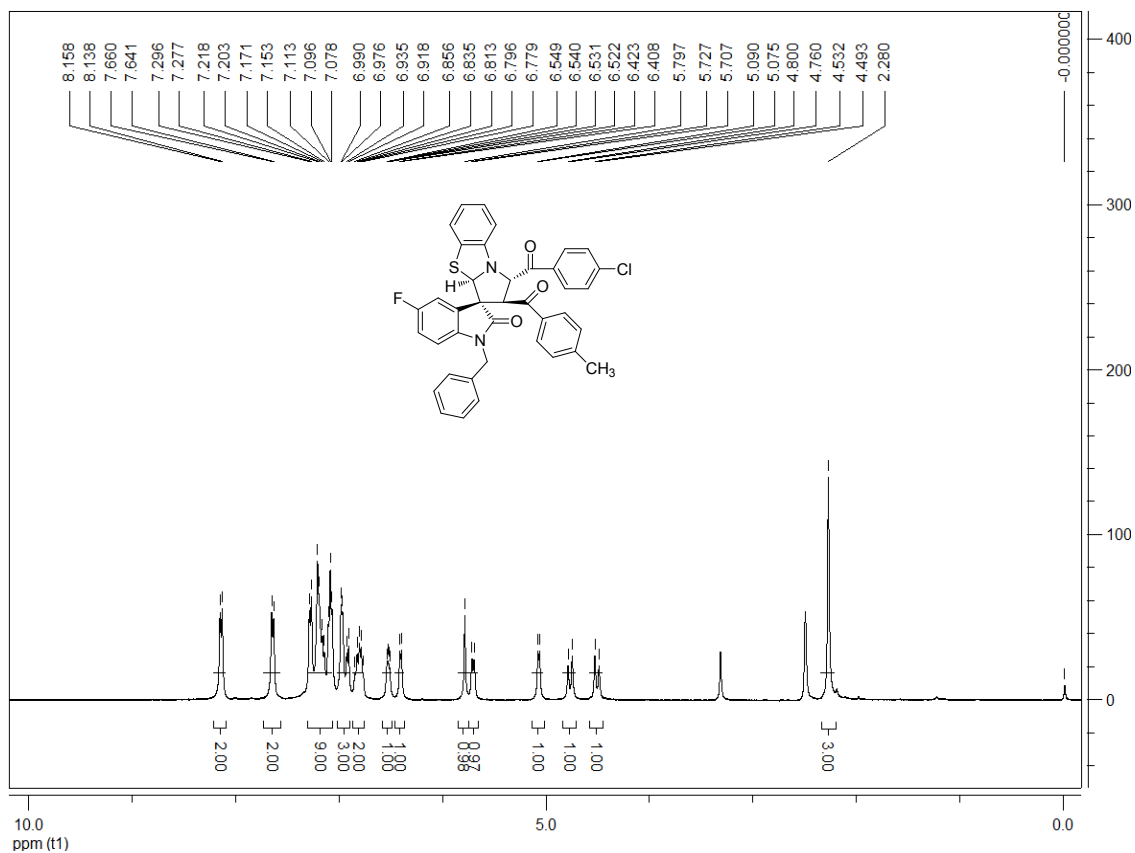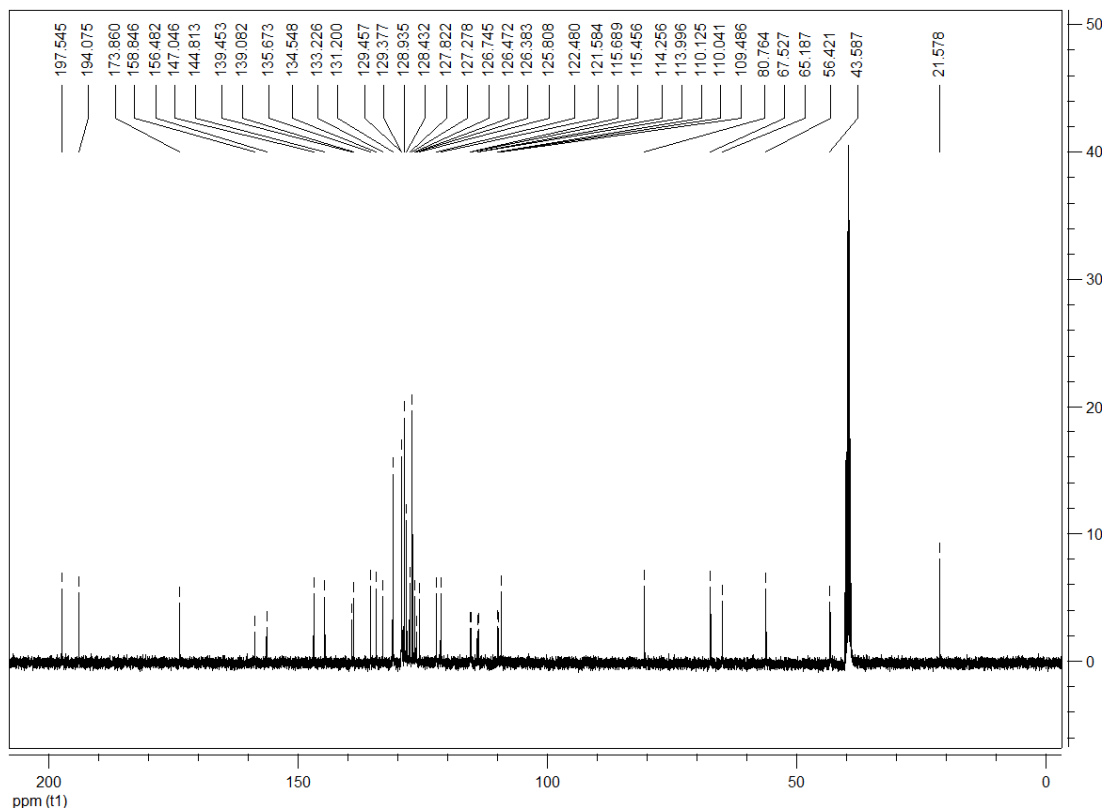

**1'-benzyl-5'-chloro-1-(4-chlorobenzoyl)-2-(4-methylbenzoyl)-2,3a-dihydro-1H-spiro[benzo[d]pyrrolo[2,1-b]thiazole-3,3'-indolin]-2'-one (31):**

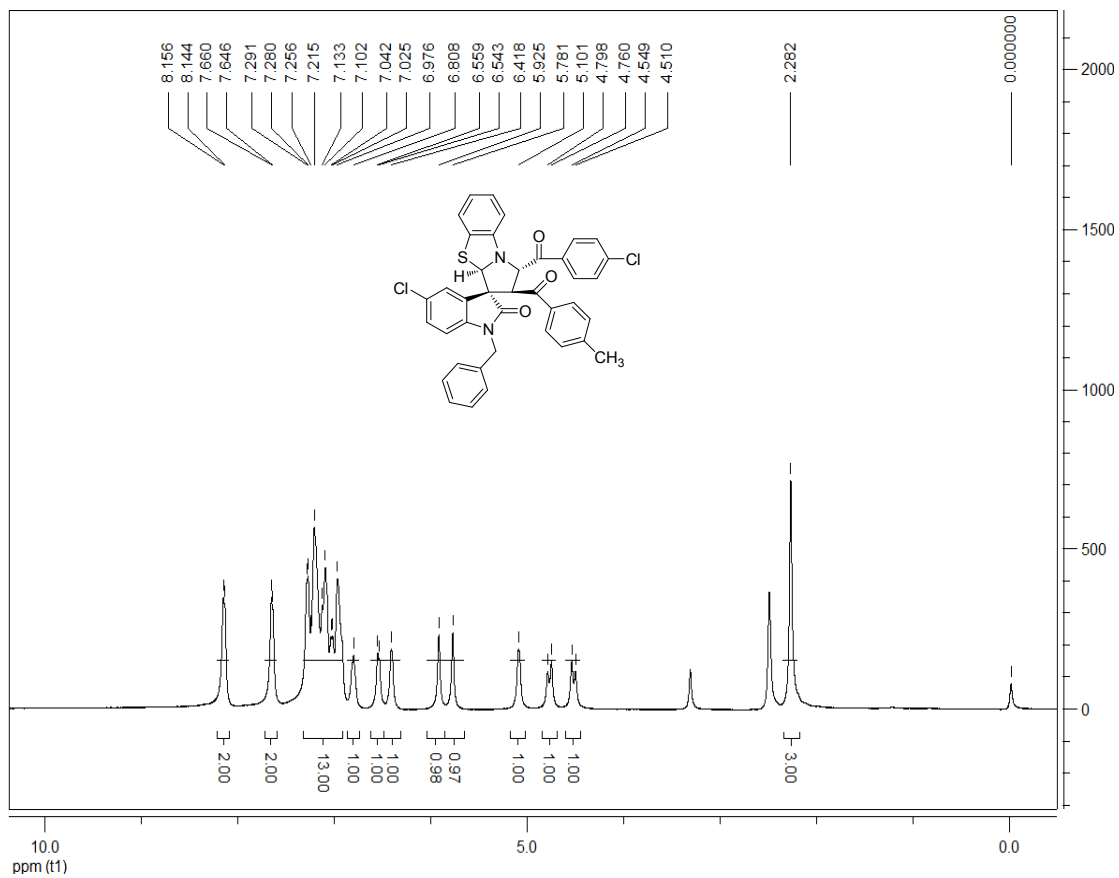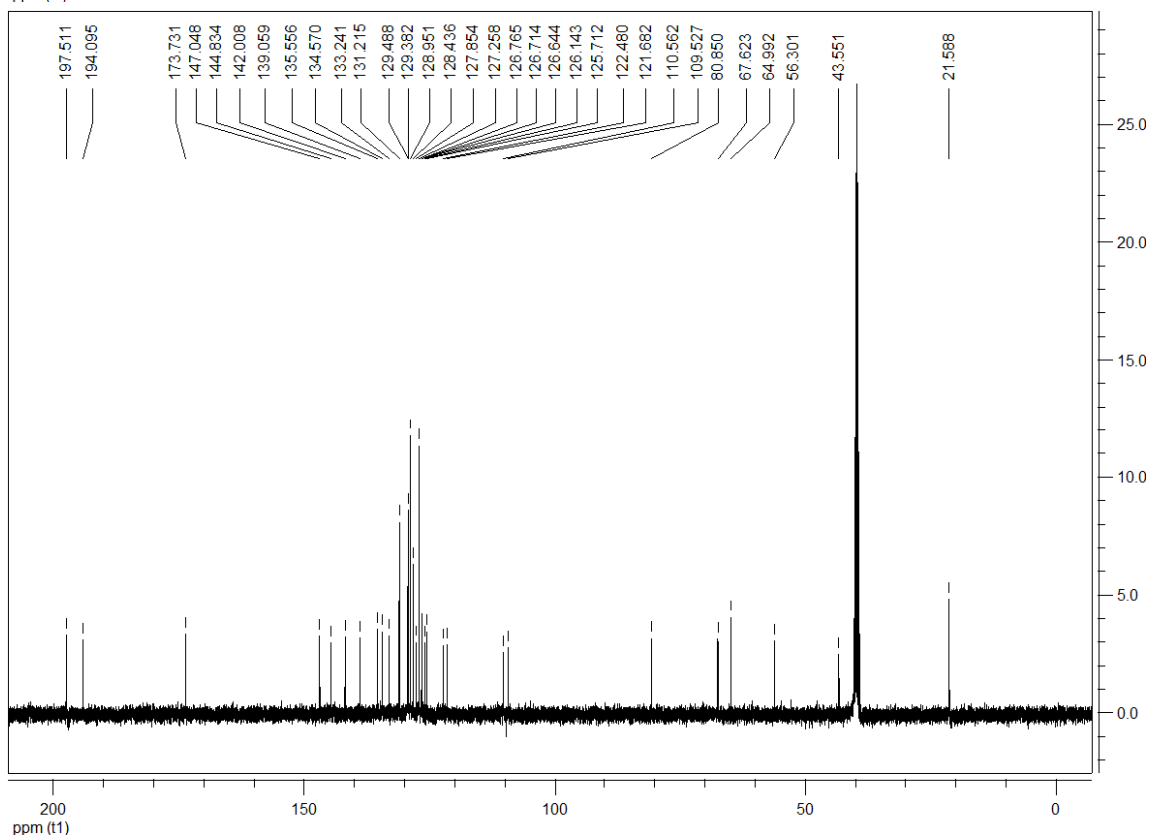

**1'-butyl-5'-chloro-1-(4-chlorobenzoyl)-2-(4-methylbenzoyl)-2,3a-dihydro-1H-spiro[benzo[d]pyrrolo[2,1-b]thiazole-3,3'-indolin]-2'-one (3m):**

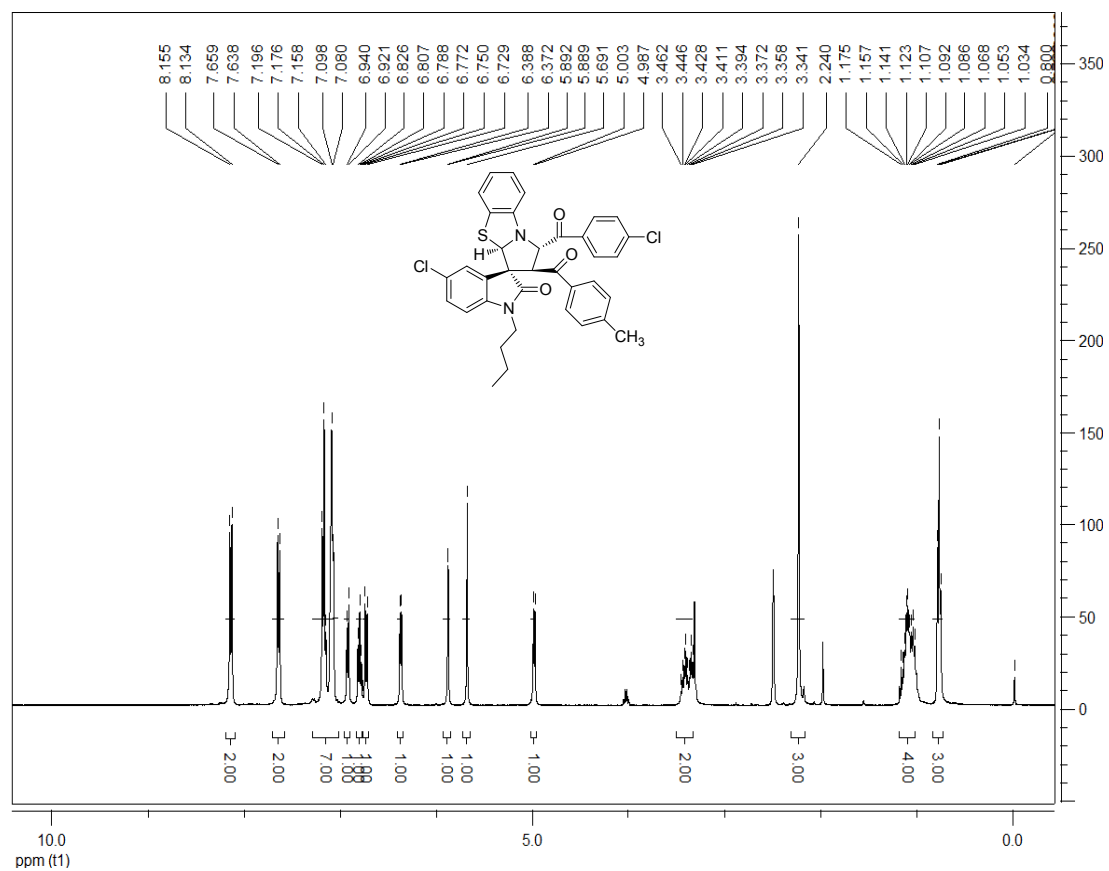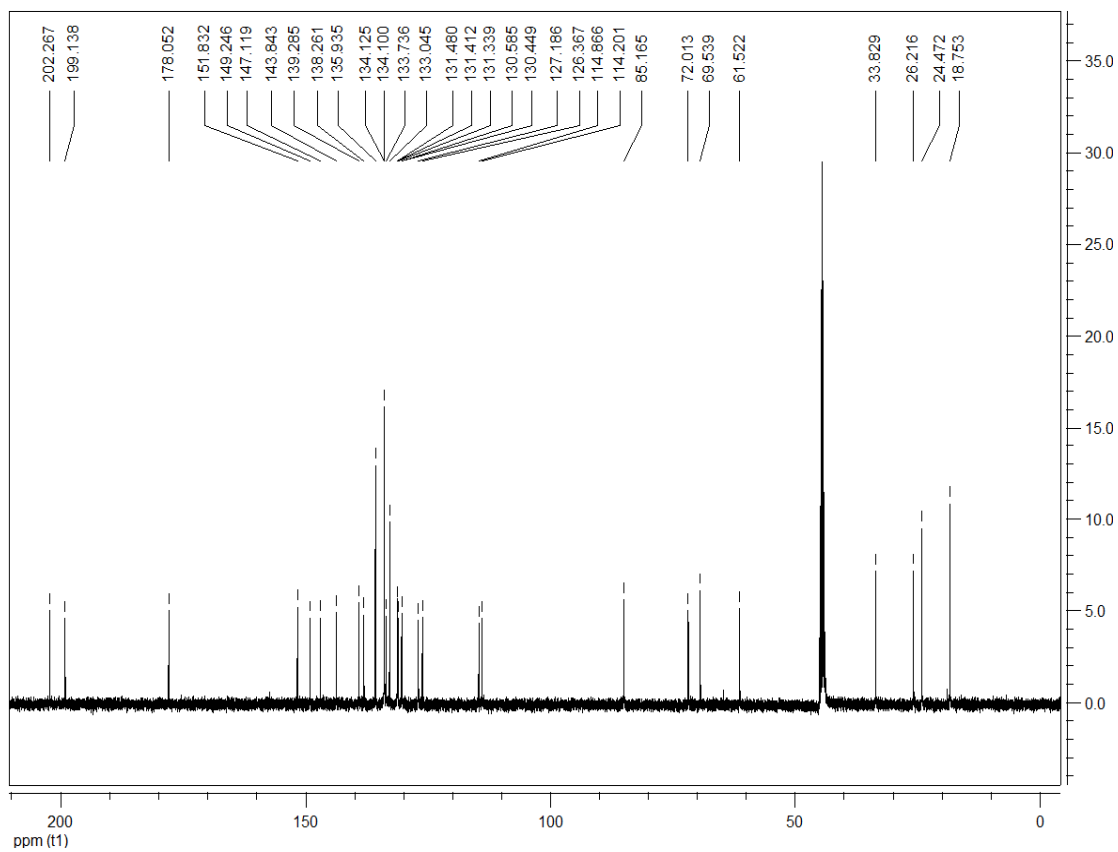

**1'-benzyl-5'-chloro-2'-oxo-2,3a-dihydro-1H-spiro[benzo[d]pyrrolo[2,1-b]thiazole-3,3'-indoline]-1,2-diy]bis((4-chlorophenyl)methanone) (3n):**

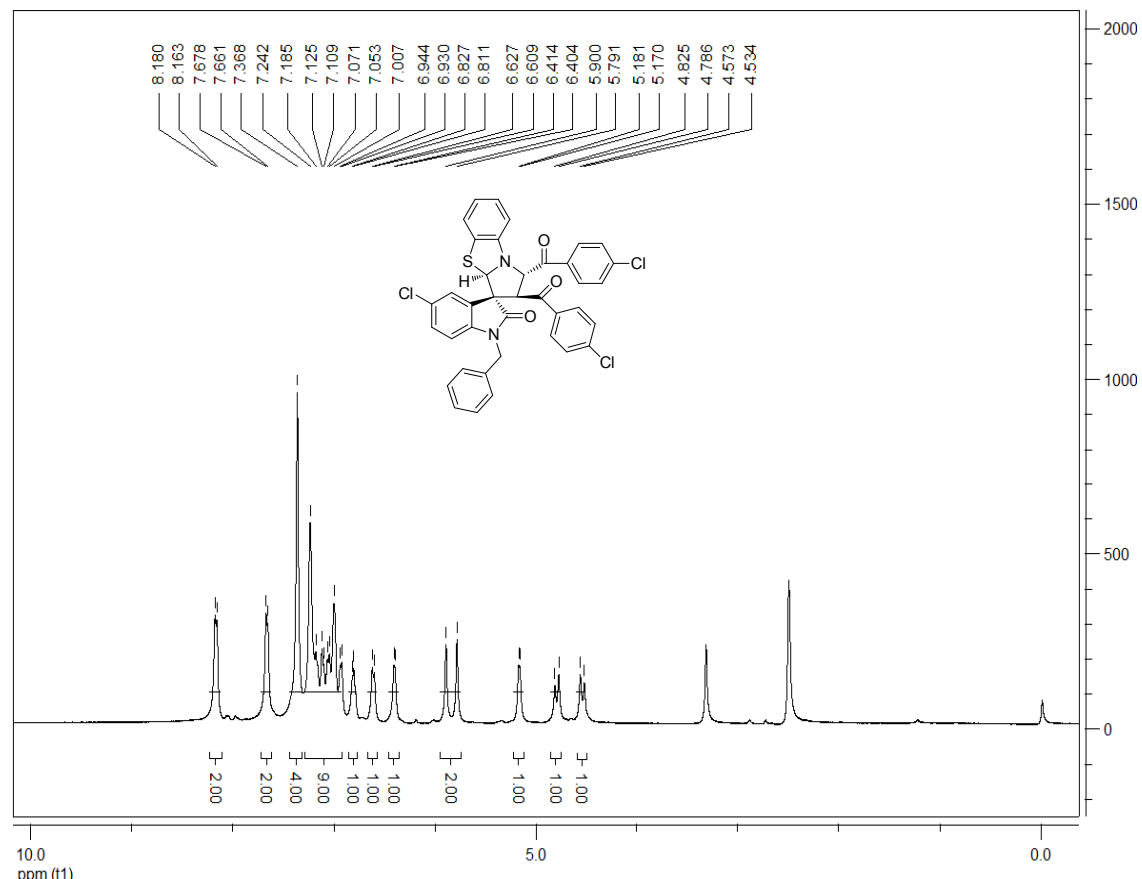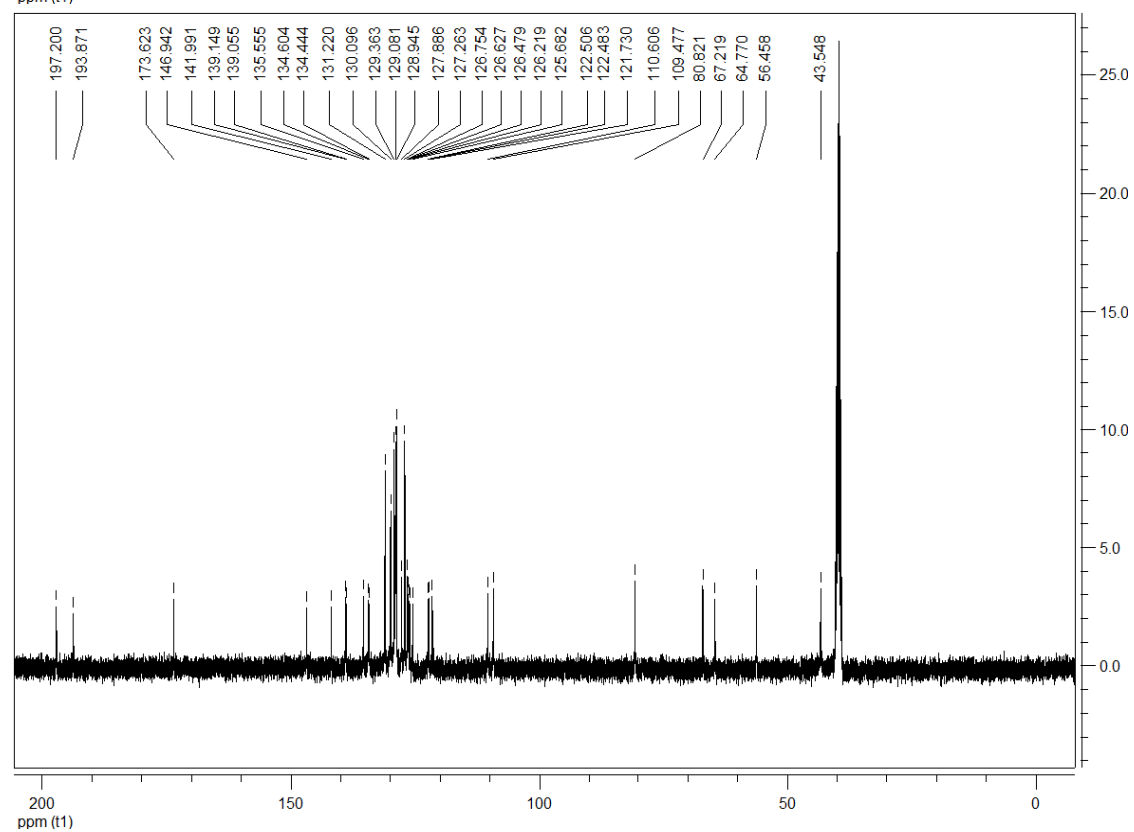

**1'-benzyl-5'-chloro-1-(4-fluorobenzoyl)-2-(4-methylbenzoyl)-2,3a-dihydro-1H-spiro[benzo[d]pyrrolo[2,1-b]thiazole-3,3'-indolin]-2'-one (3o):**

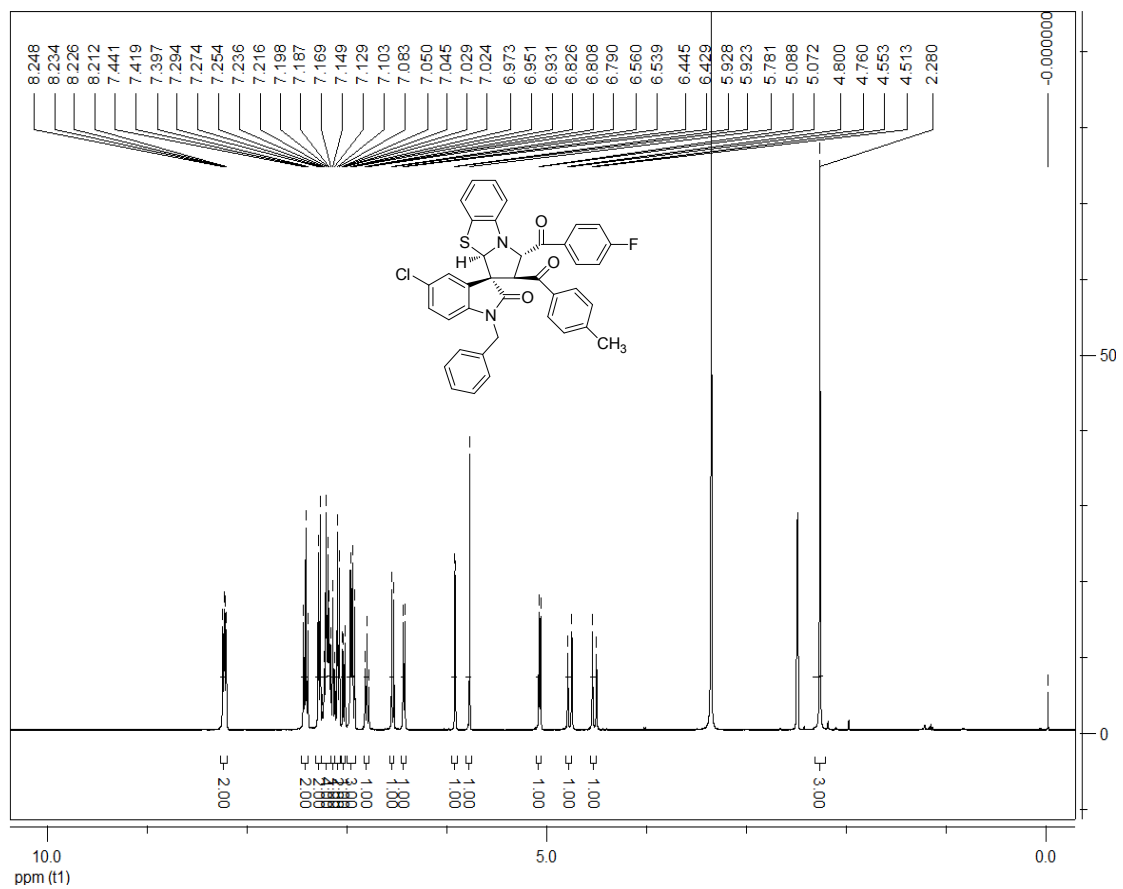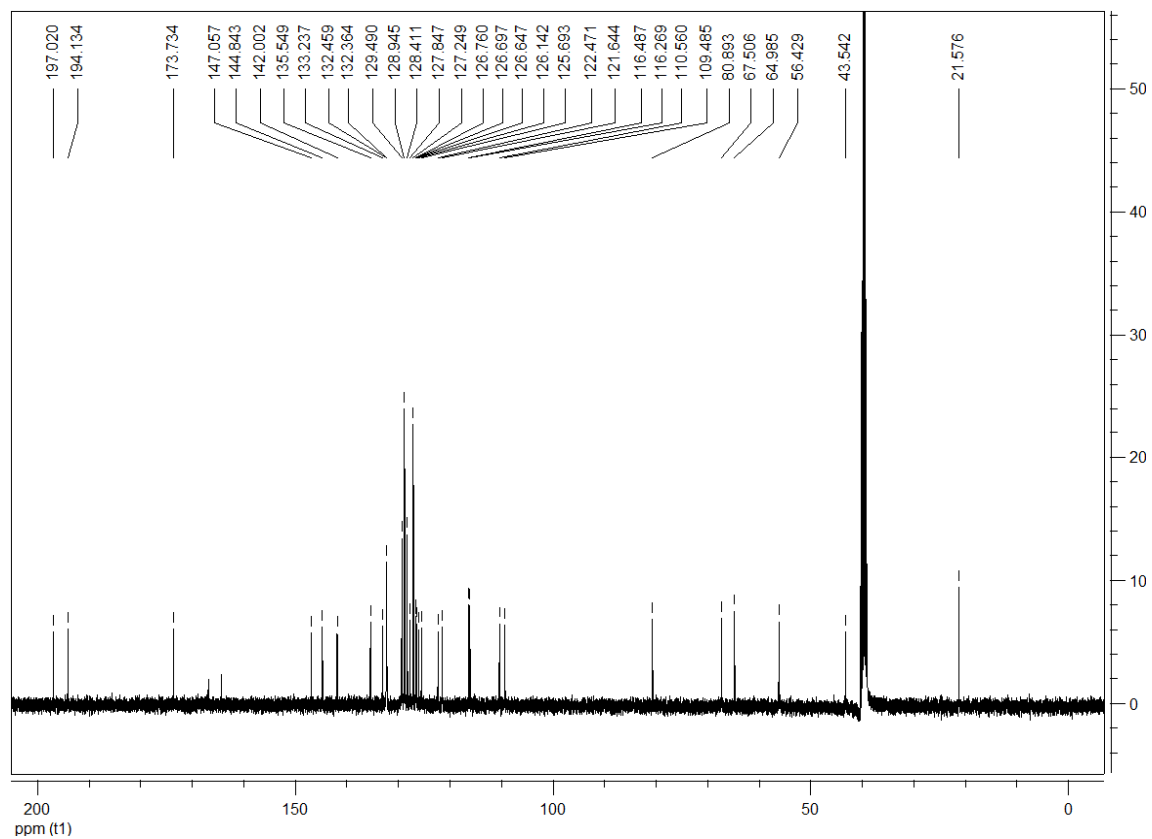



**2-benzoyl-1'-benzyl-5'-methyl-1-(4-methylbenzoyl)-2,3a-dihydro-1H-spiro[benzo[d]pyrrolo[2,1-b]thiazole-3,3'-indolin]-2'-one (3p):**

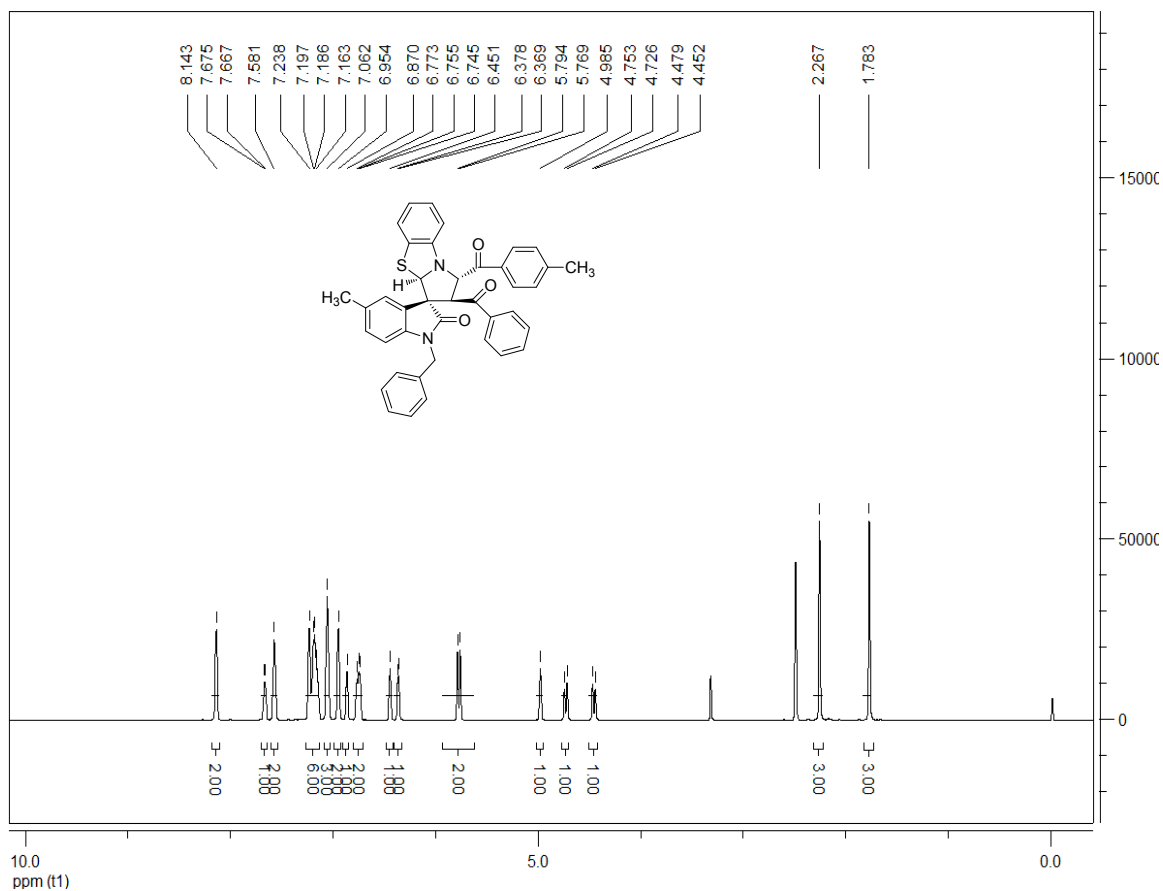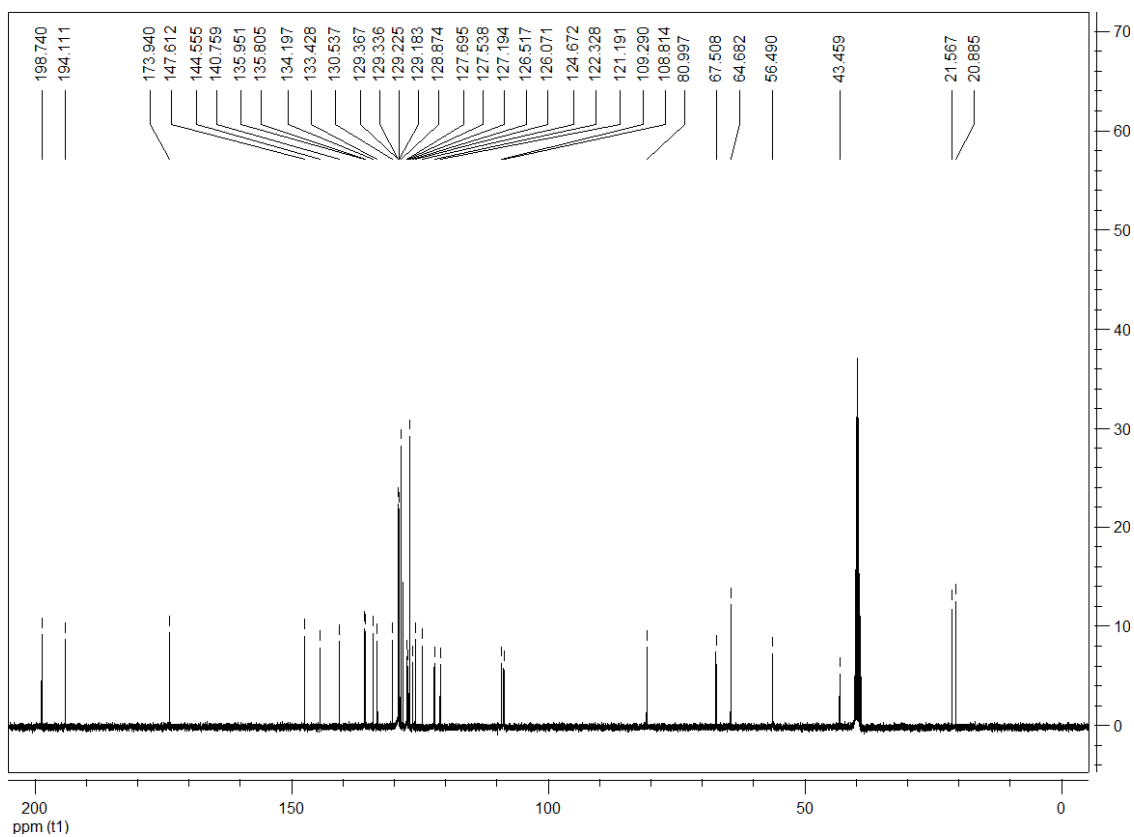

**1'-benzyl-5'-chloro-1-(4-methoxybenzoyl)-2-(4-methylbenzoyl)-2,3a-dihydro-1H-spiro[benzo[d]pyrrolo[2,1-b]thiazole-3,3'-indolin]-2'-one (3q):**

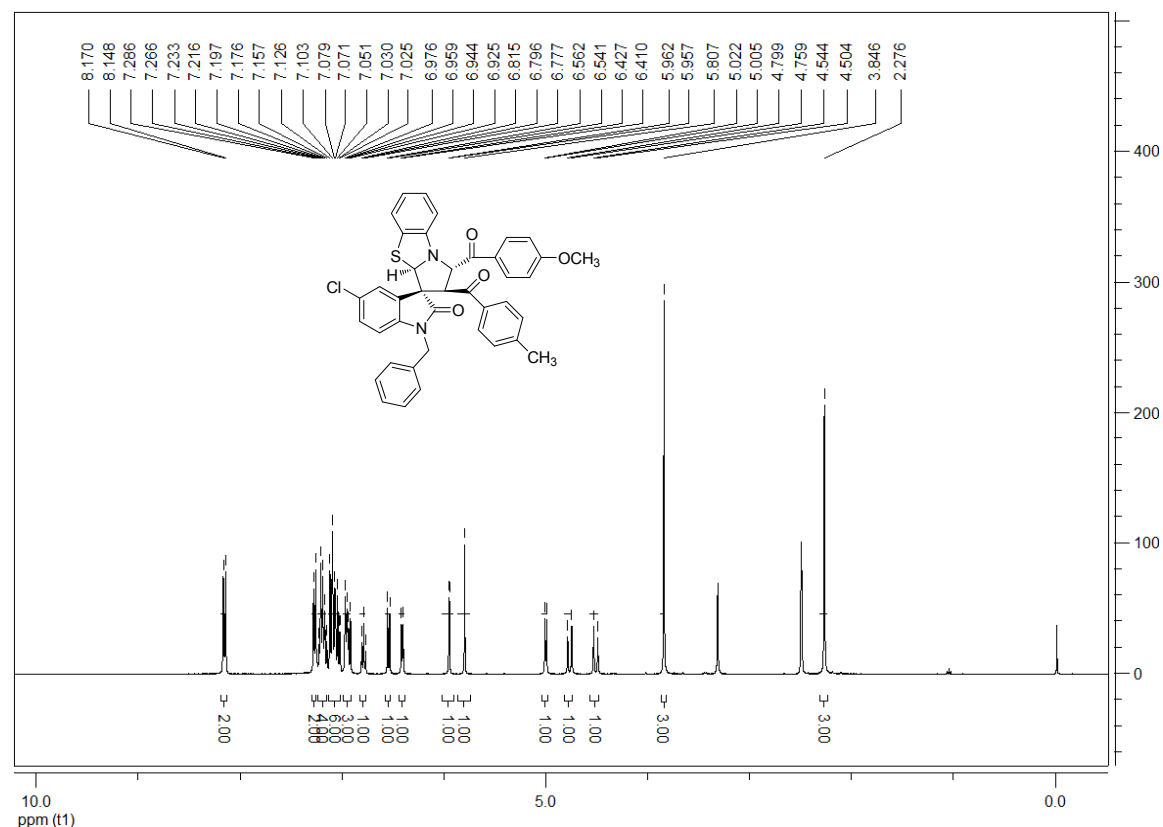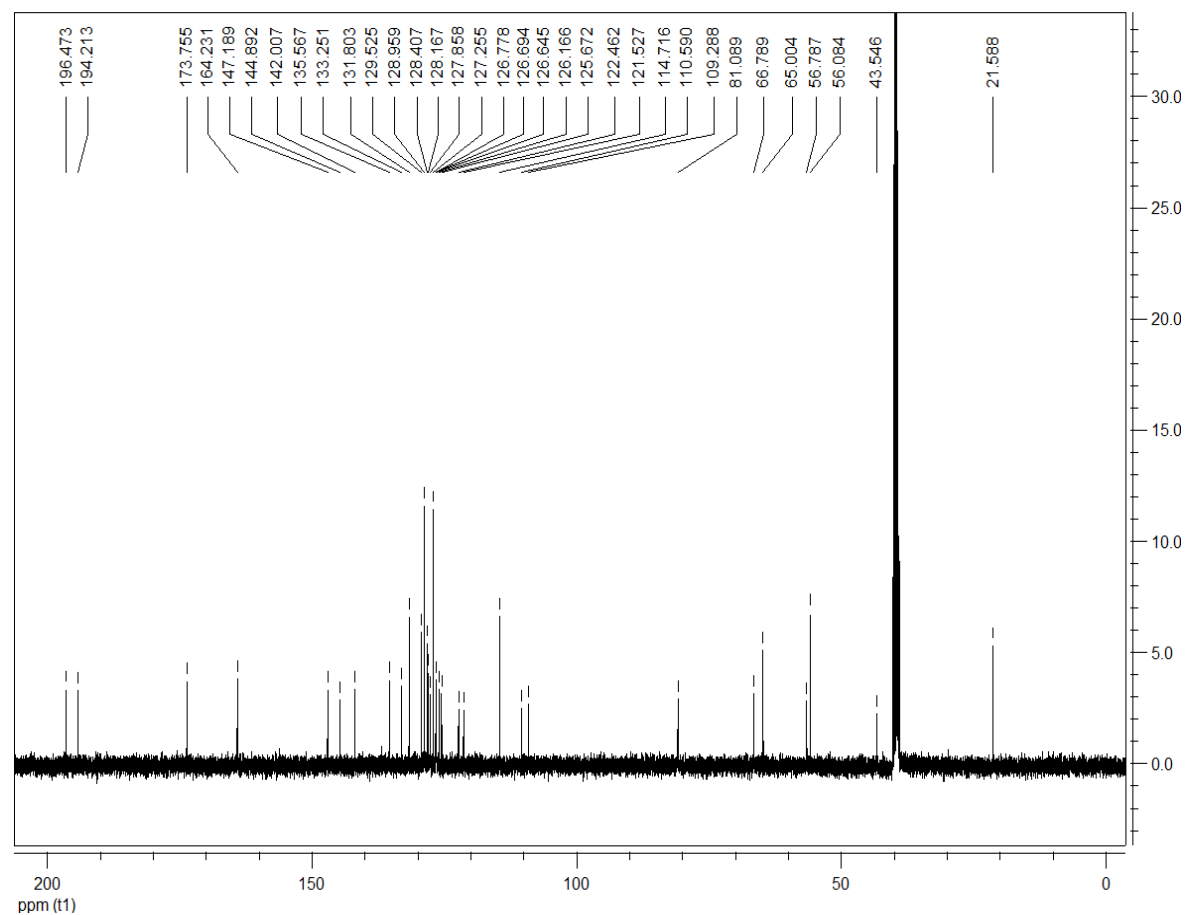

**Ethyl 1-benzoyl-1'-benzyl-5'-fluoro-2'-oxo-2,3a-dihydro-1H-spiro[benzo[d]pyrrolo[2,1-b]-thiazole-3,3'-indoline]-2-carboxylate (4a):**

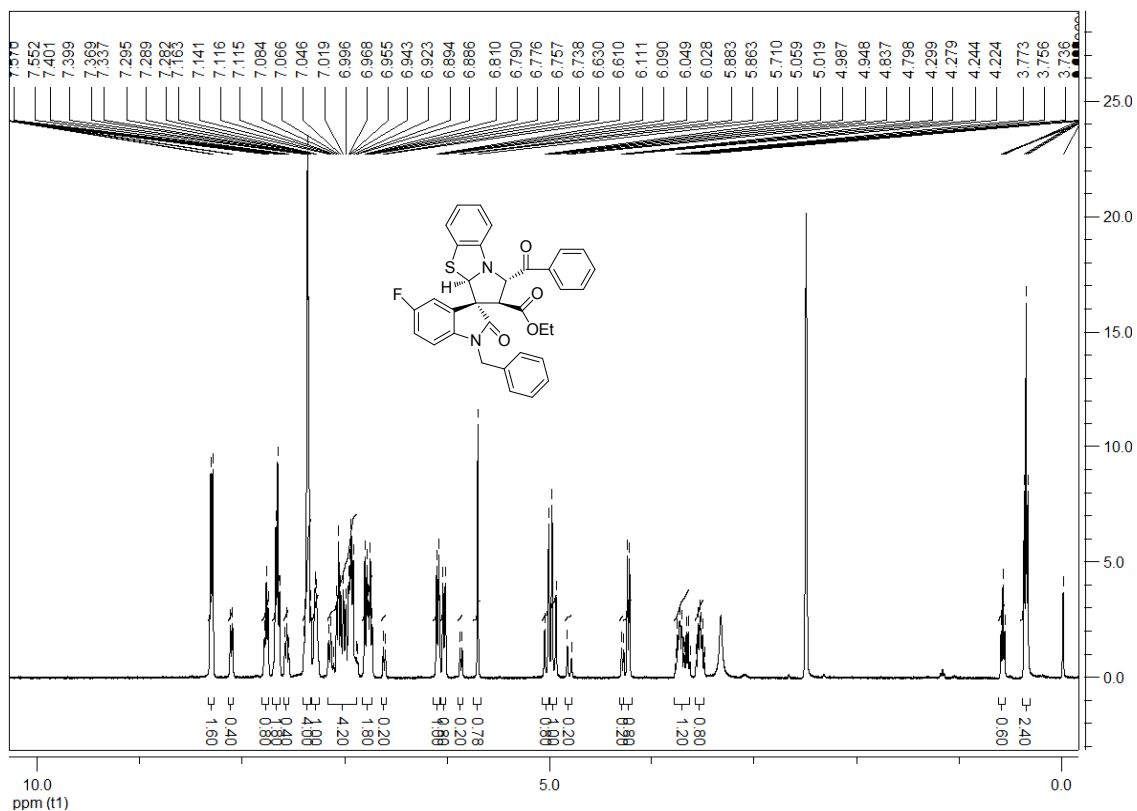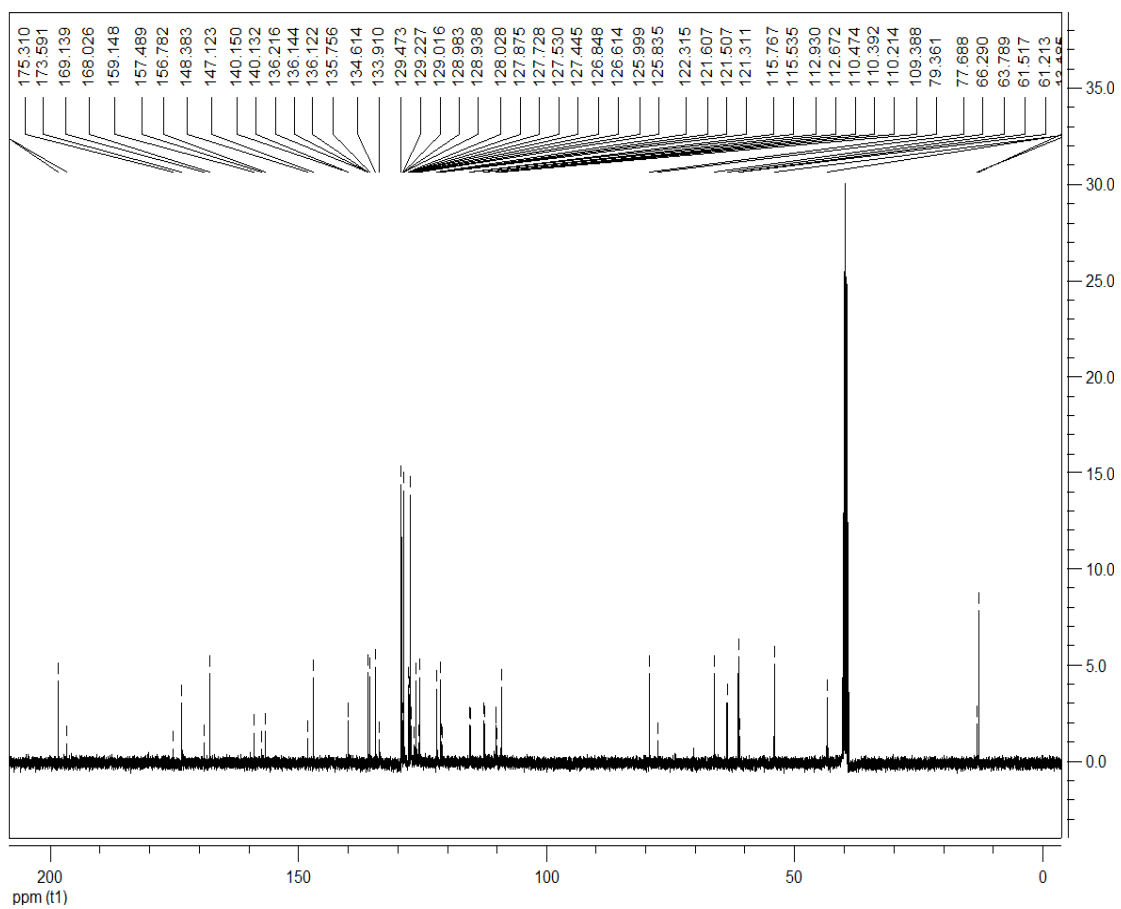

**Ethyl 1-(4-chlorobenzoyl)-2'-oxo-2,3a-dihydro-1H-spiro[benzo[d]pyrrolo[2,1-b]thiazole-3,3'-indoline]-2-carboxylate (4b):**

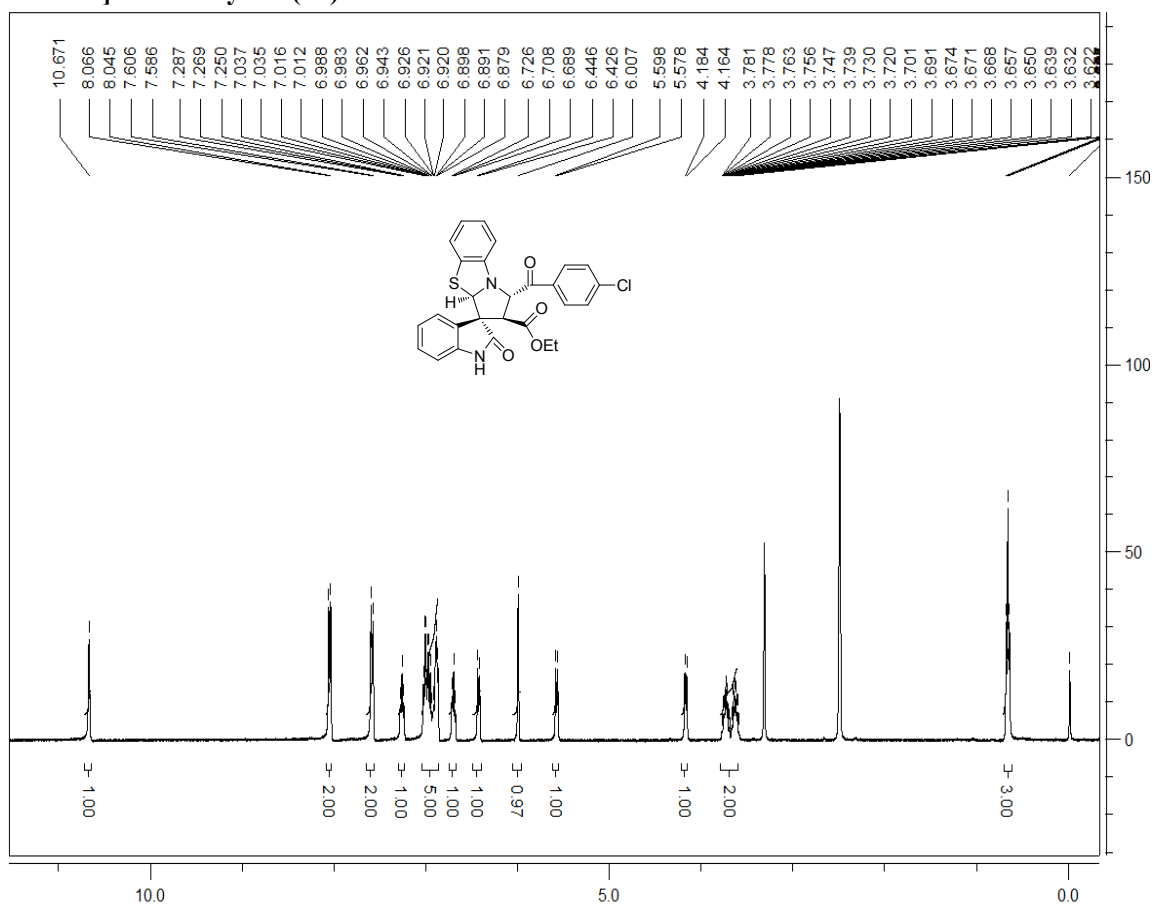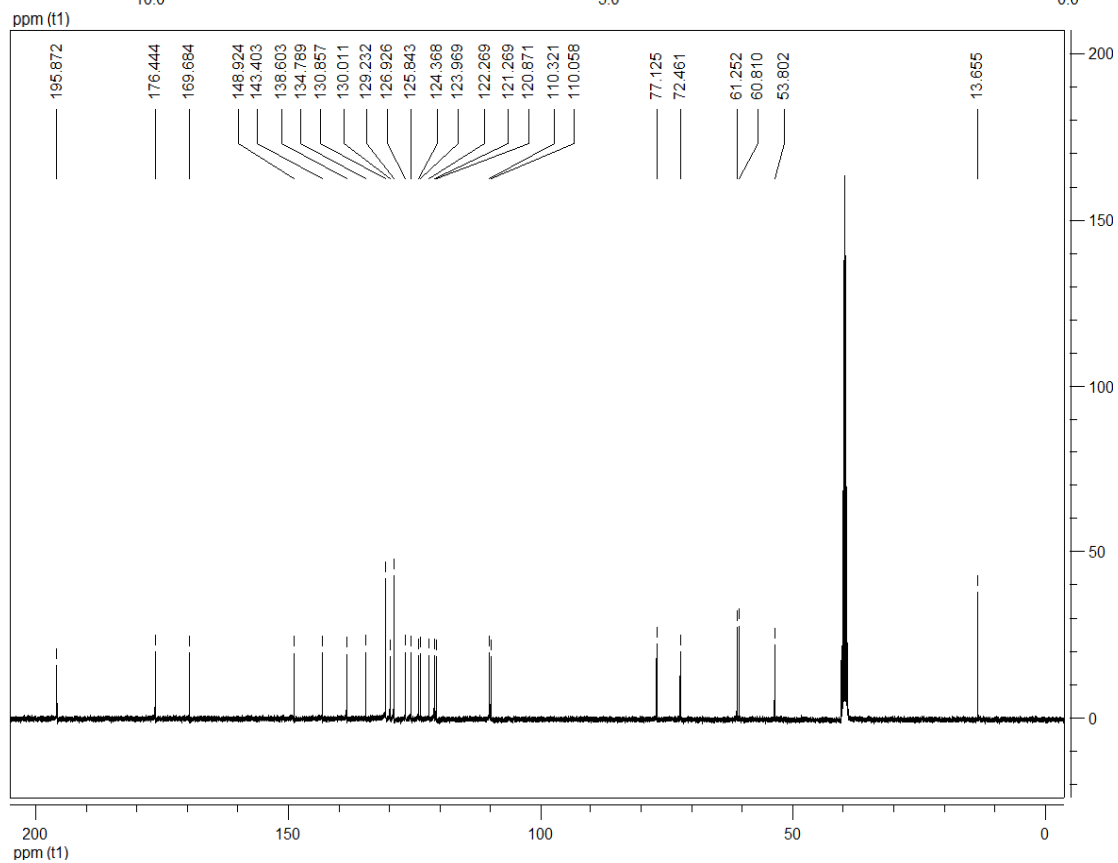

**Ethyl 5'-chloro-1-(4-chlorobenzoyl)-2'-oxo-2,3a-dihydro-1H-spiro[benzo[d]pyrrolo[2,1-b]-thiazole-3,3'-indoline]-2-carboxylate (4c):**

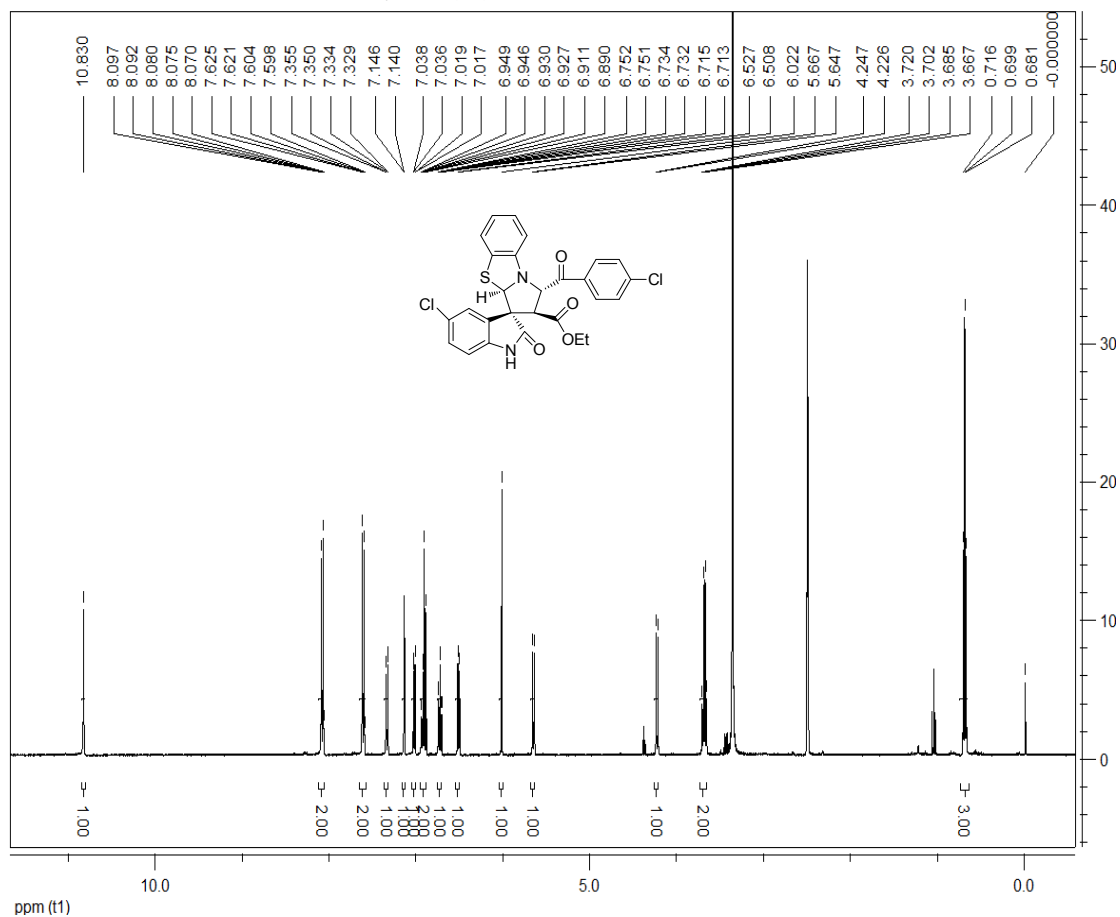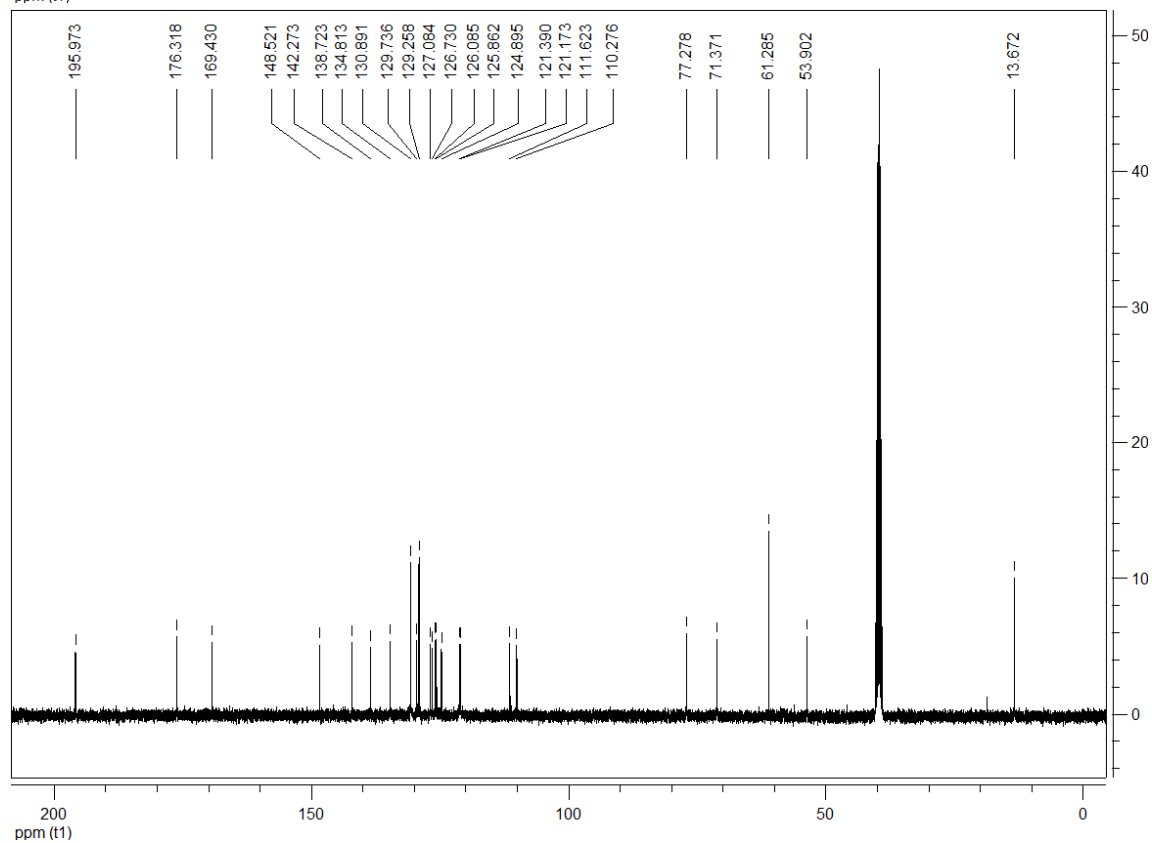

**Ethyl 1'-benzyl-1-(4-chlorobenzoyl)-5'-chloro-2'-oxo-2,3a-dihydro-1H-spiro[benzo[d]-pyrrolo[2,1-b]thiazole-3,3'-indoline]-2-carboxylate (4d):**

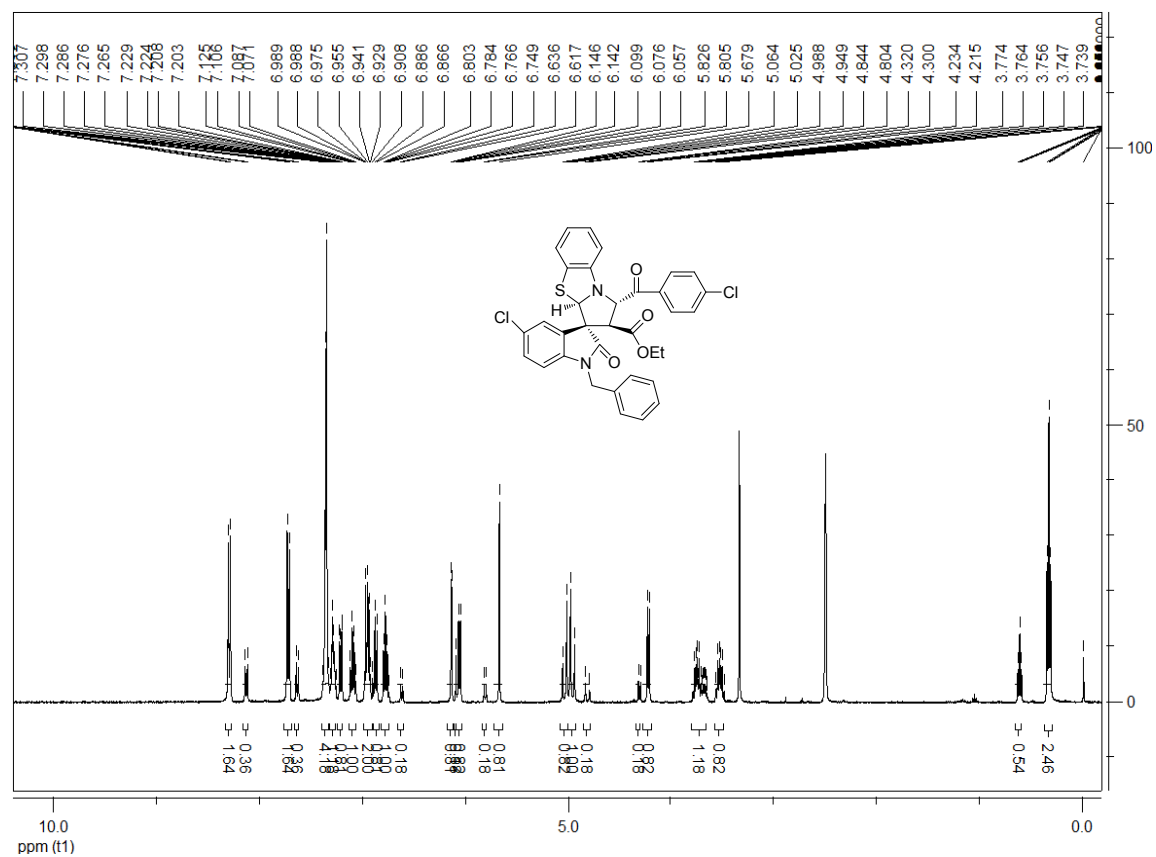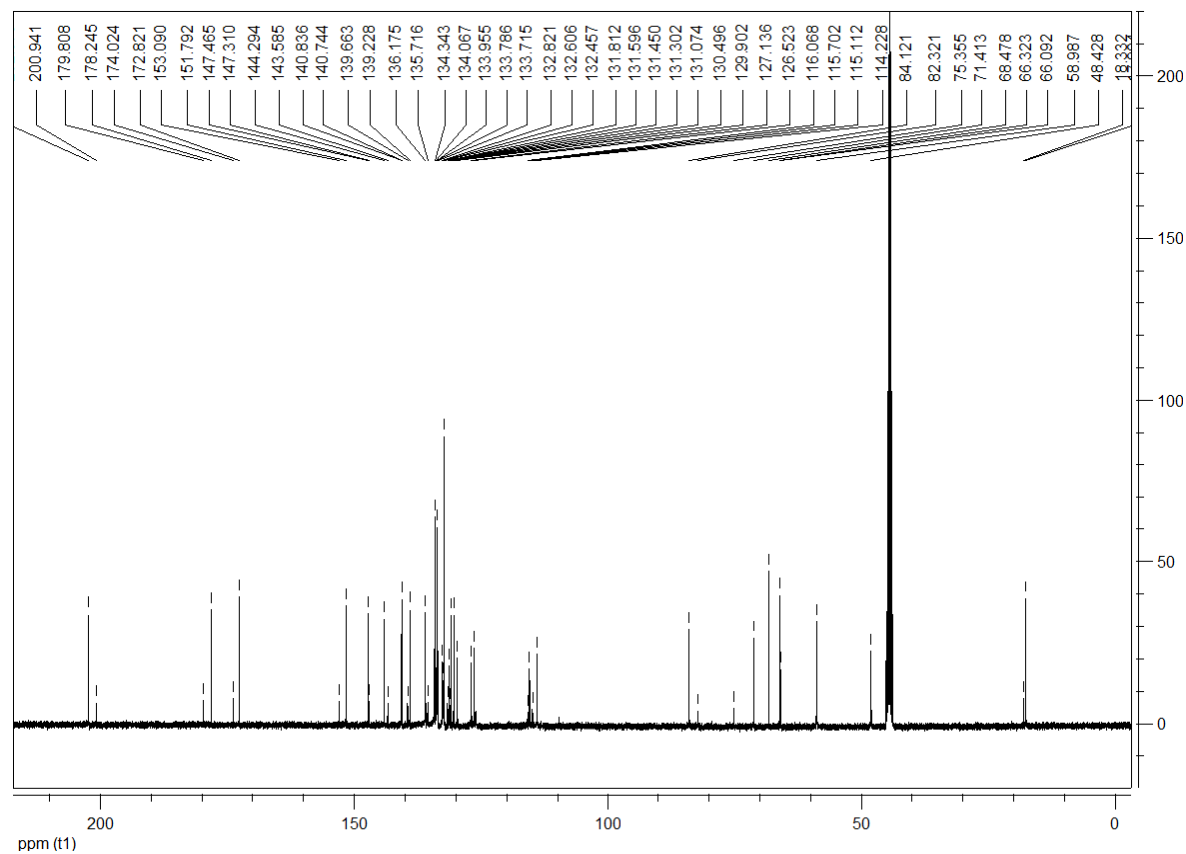

**Ethyl 1'-benzyl-1-(4-chlorobenzoyl)-5'-fluoro-2'-oxo-2,3a-dihydro-1H-spiro[benzo[d]-pyrrolo[2,1-b]thiazole-3,3'-indoline]-2-carboxylate (4e):**

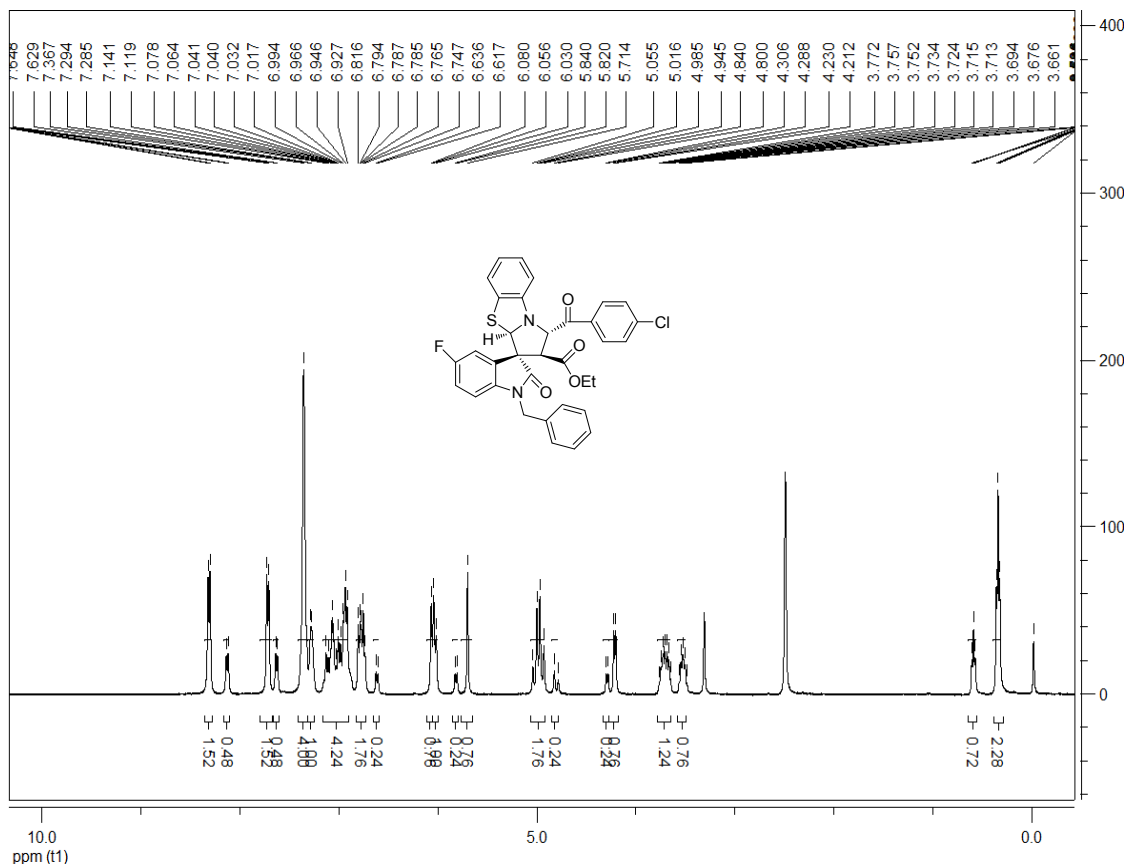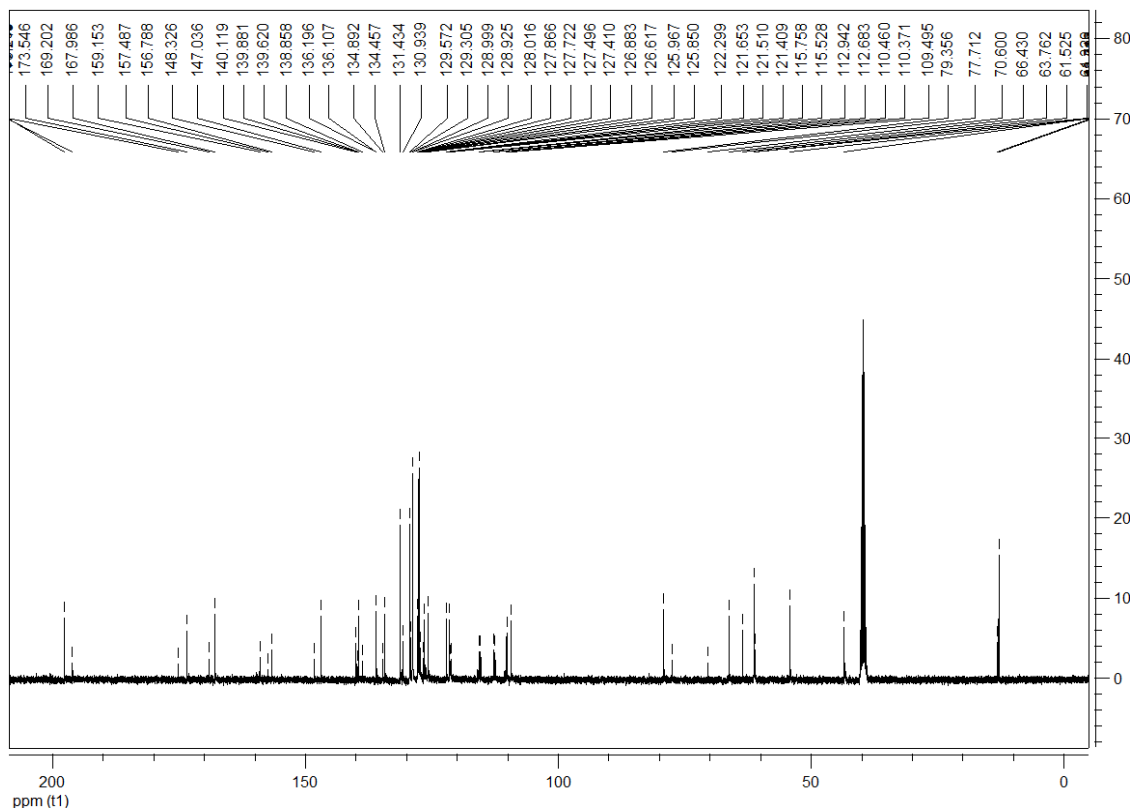

**Ethyl 1'-benzyl-5'-chloro-1-(4-methoxybenzoyl)-2'-oxo-2,3a-dihydro-1H-spiro[benzo[d]-pyrrolo[2,1-b]thiazole-3,3'-indoline]-2-carboxylate (4f):**

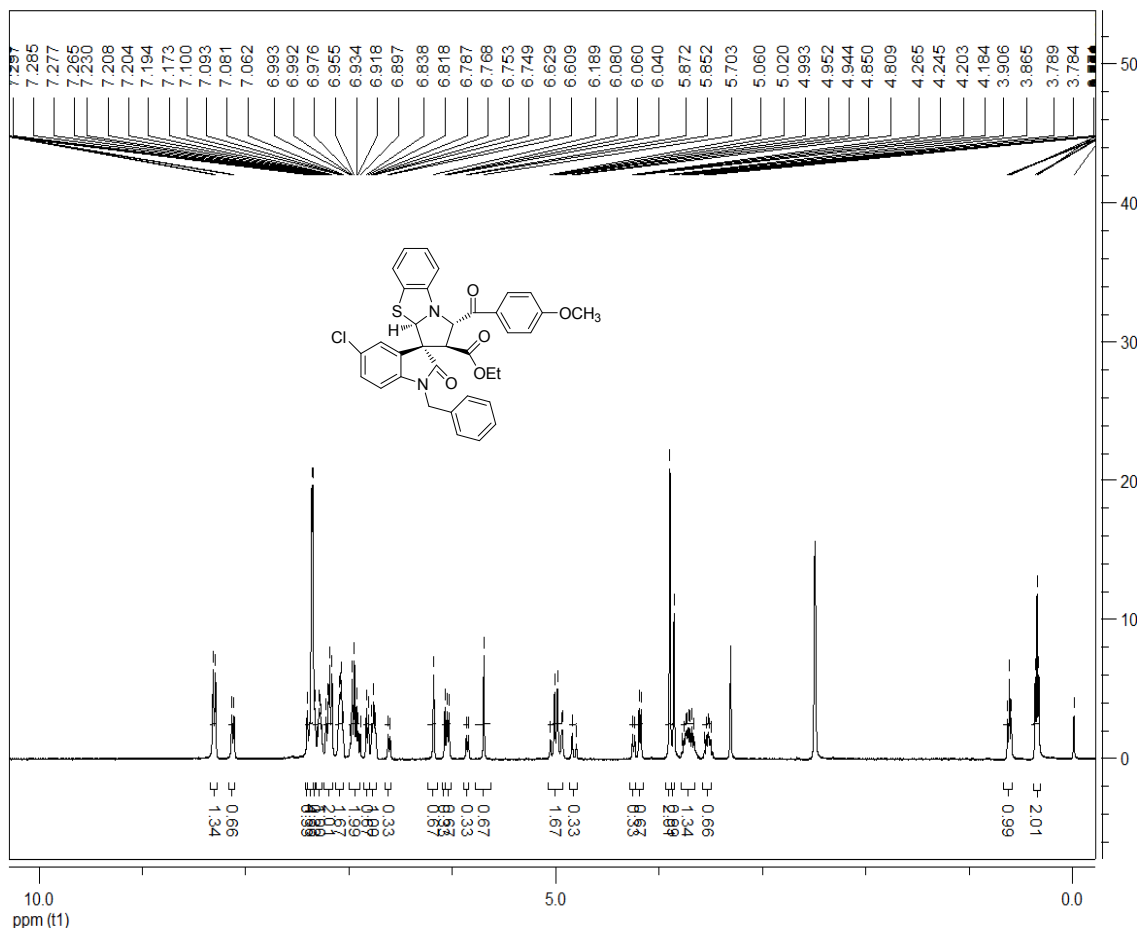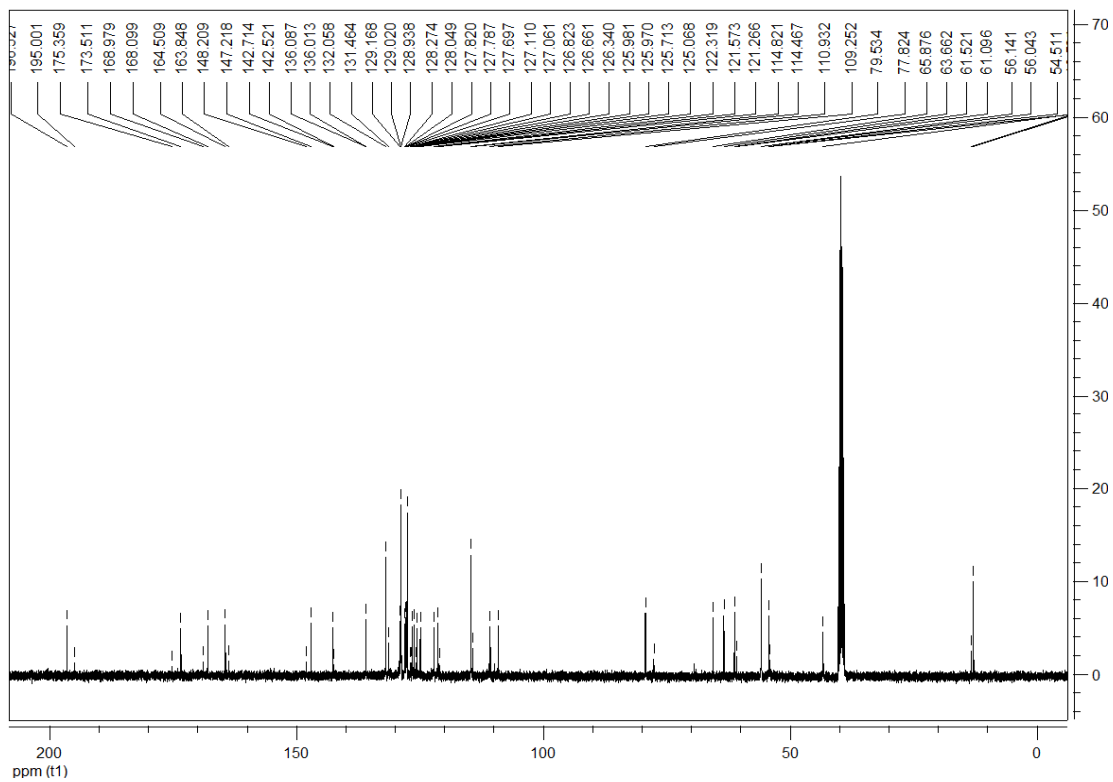



**1-benzyl-5'-(4-chlorobenzoyl)-5-fluoro-6'-(4-methylbenzoyl)-6',7a'-dihydro-5'H-spiro[indoline-3,7'-pyrrolo[2,1-b]thiazol]-2-one (5a):**

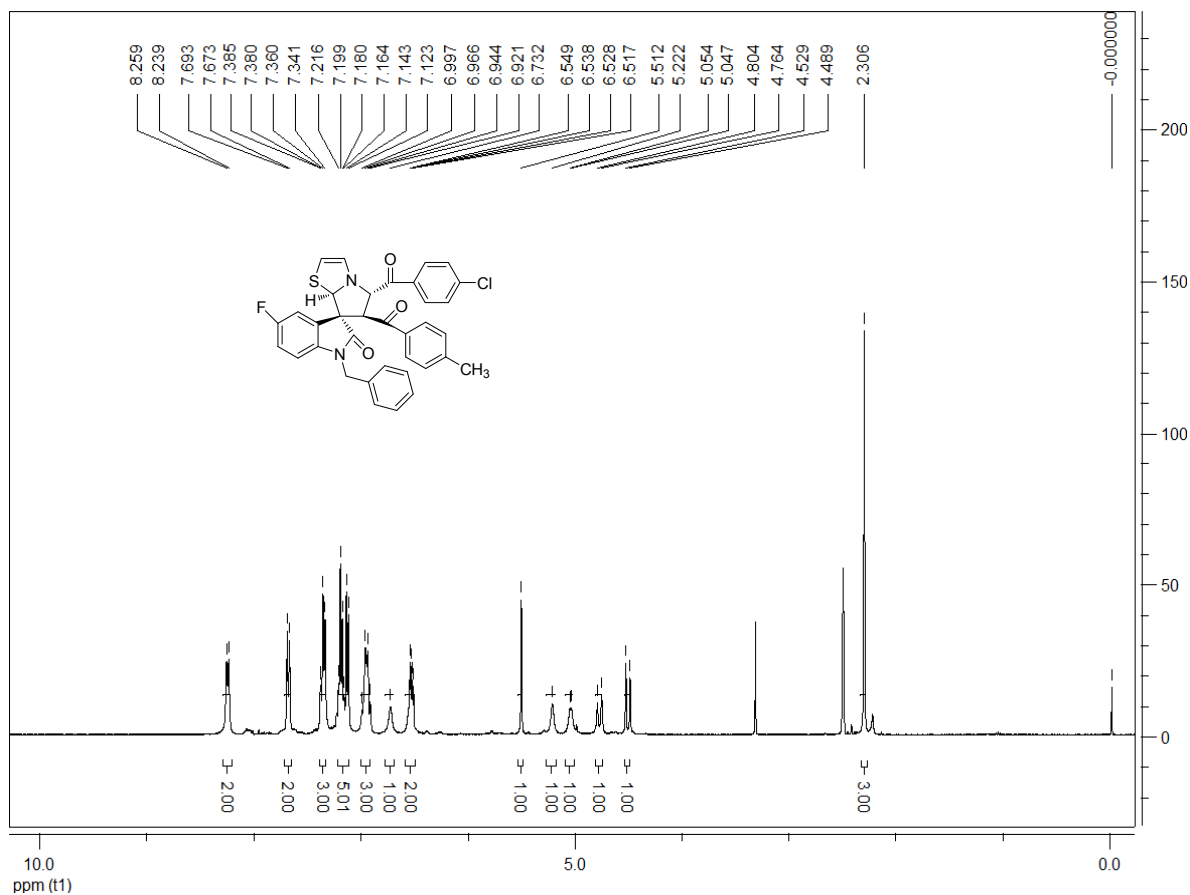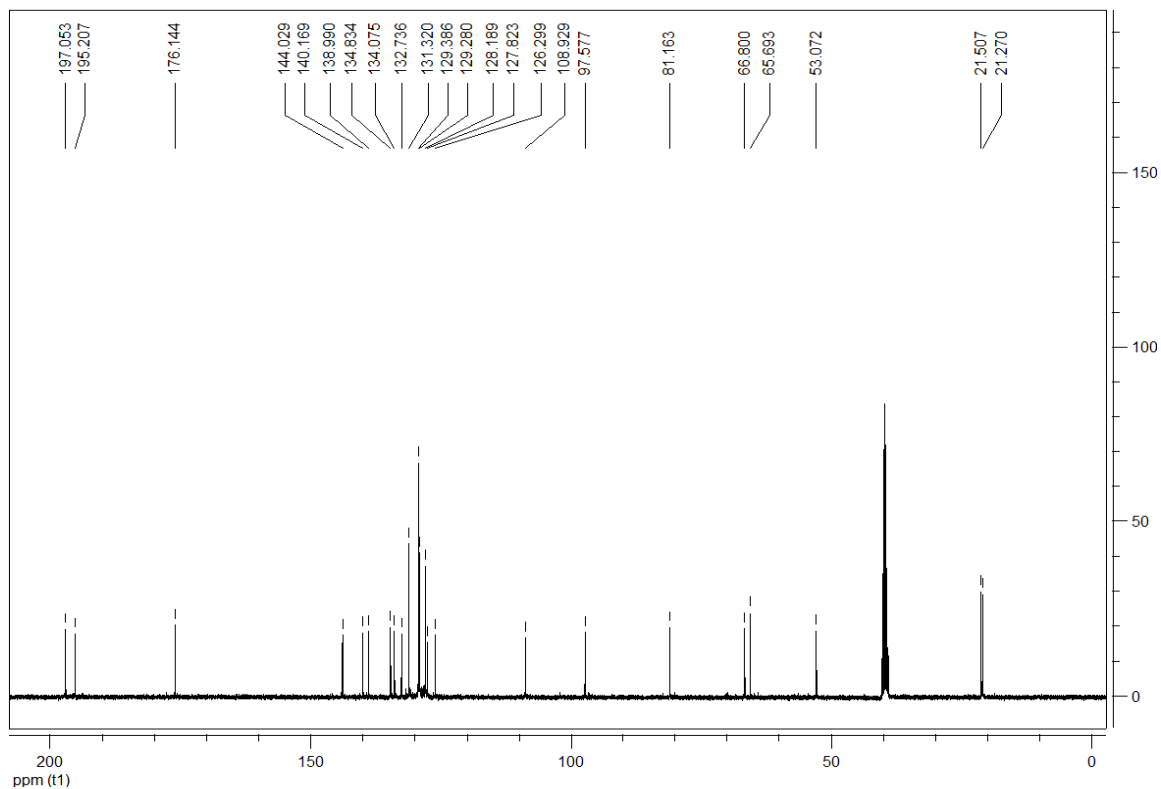

**1-benzyl-5-chloro-5'-(4-chlorobenzoyl)-6'-(4-methylbenzoyl)-6',7a'-dihydro-5'H-spiro[indoline-3,7'-pyrrolo[2,1-b]thiazol]-2-one (5b):**

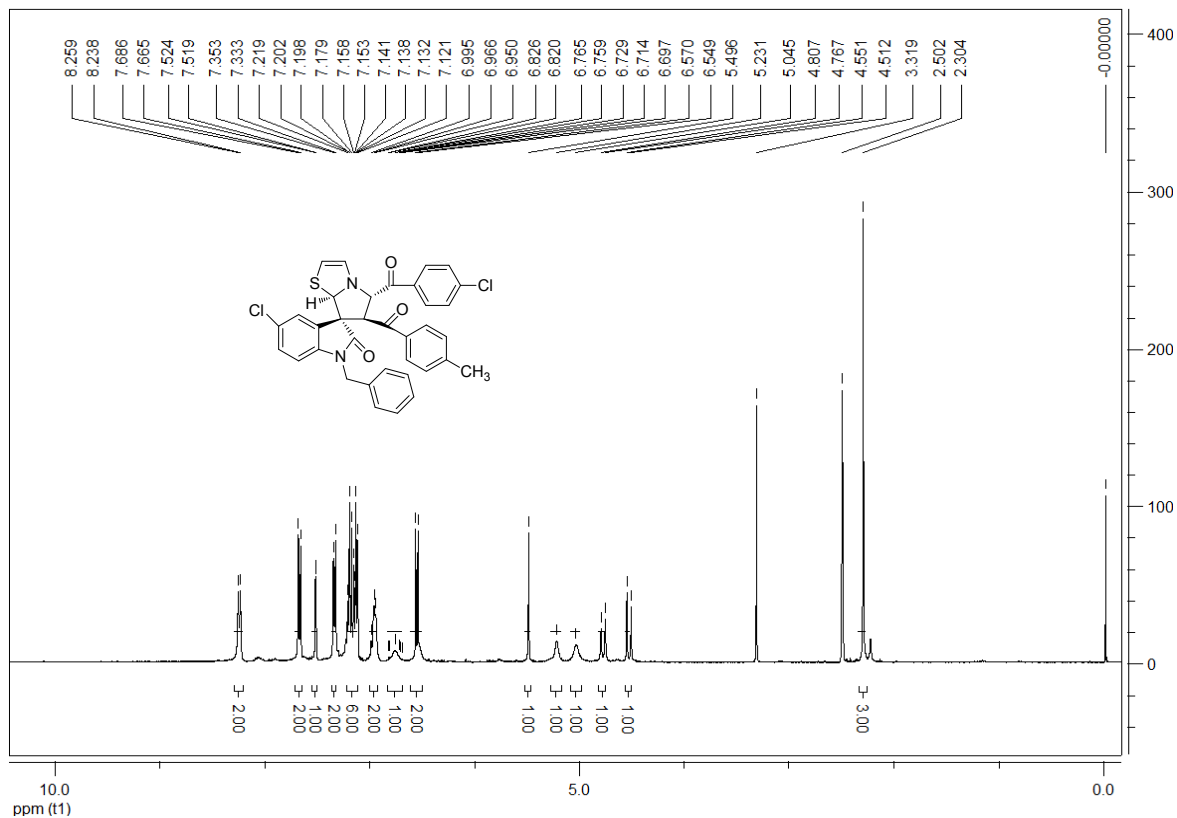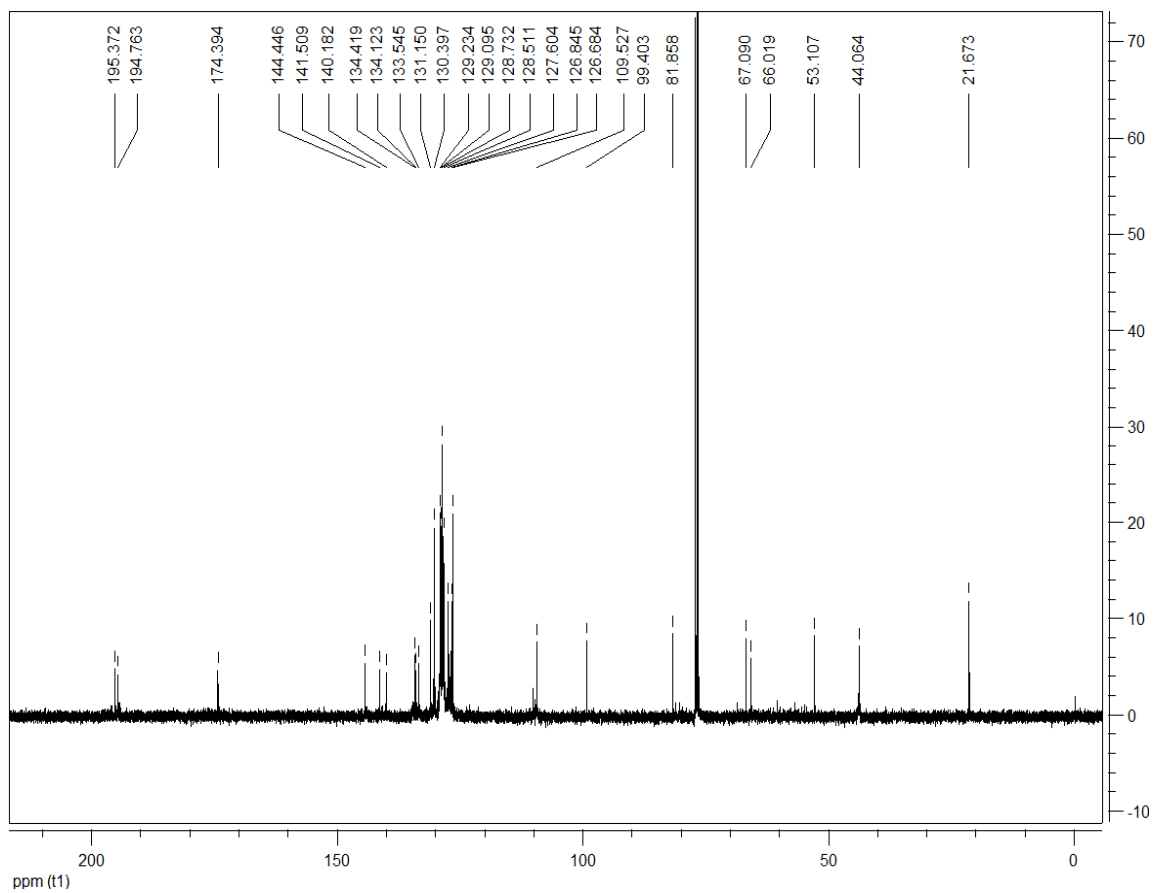

Supplement: c5ob01374g1.pdf [file c5ob01374g1.pdf]
